# Supplementary material for: Factors predicting successful vaginal birth after caesarean section: protocol for evidence-based consensus recommendations using a Delphi survey
Source: PubMed Central journal article supplement — BMJ Open. 2021 May 5;11(5):e047433. doi: 10.1136/bmjopen-2020-047433 (PMC8103394; doi:10.1136/bmjopen-2020-047433), 2021-05-05
Supplement: bmjopen-2020-047433.draft_revisions.pdf [file bmjopen-2020-047433.draft_revisions.pdf]

# BMJ Open

BMJ Open is committed to open peer review. As part of this commitment we make the peer review history of every article we publish publicly available.

When an article is published we post the peer reviewers' comments and the authors' responses online. We also post the versions of the paper that were used during peer review. These are the versions that the peer review comments apply to.

The versions of the paper that follow are the versions that were submitted during the peer review process. They are not the versions of record or the final published versions. They should not be cited or distributed as the published version of this manuscript.

BMJ Open is an open access journal and the full, final, typeset and author-corrected version of record of the manuscript is available on our site with no access controls, subscription charges or pay-per-view fees (<http://bmjopen.bmj.com>).

If you have any questions on BMJ Open's open peer review process please email [info.bmjopen@bmj.com](mailto:info.bmjopen@bmj.com)

# BMJ Open

## Factors predicting successful vaginal birth after caesarean section: protocol for evidence-based consensus recommendations using a Delphi survey

|                               |                                                                                                                                                                                                                                                                                                                                                                                                                                                                                                                                                                                                                                                                                                                      |
|-------------------------------|----------------------------------------------------------------------------------------------------------------------------------------------------------------------------------------------------------------------------------------------------------------------------------------------------------------------------------------------------------------------------------------------------------------------------------------------------------------------------------------------------------------------------------------------------------------------------------------------------------------------------------------------------------------------------------------------------------------------|
| Journal:                      | <i>BMJ Open</i>                                                                                                                                                                                                                                                                                                                                                                                                                                                                                                                                                                                                                                                                                                      |
| Manuscript ID                 | bmjopen-2020-047433                                                                                                                                                                                                                                                                                                                                                                                                                                                                                                                                                                                                                                                                                                  |
| Article Type:                 | Protocol                                                                                                                                                                                                                                                                                                                                                                                                                                                                                                                                                                                                                                                                                                             |
| Date Submitted by the Author: | 28-Nov-2020                                                                                                                                                                                                                                                                                                                                                                                                                                                                                                                                                                                                                                                                                                          |
| Complete List of Authors:     | Zhu, Weiyang ; Jiaying University, Obstetric Department of Jiaying Maternity and Children Health Care Hospital<br>Ai, Ling ; Jiaying University, Obstetric Department of Jiaying Maternity and Children Health Care Hospital<br>Feng, Ying ; Jiaying University, Obstetric Department of Jiaying Maternity and Children Health Care Hospital<br>Yuan, Haiyan ; Jiaying University, Obstetric Department of Jiaying Maternity and Children Health Care Hospital<br>Wang, Yu ; Jiaying University, Science and Education Division of Jiaying Maternity and Children Health Care Hospital<br>Wang, Meitang ; Changhai Hospital, Emergency Department<br>Mei, Zubing; Shuguang Hospital, Department of Anorectal Surgery |
| Keywords:                     | OBSTETRICS, PREVENTIVE MEDICINE, Protocols & guidelines < HEALTH SERVICES ADMINISTRATION & MANAGEMENT                                                                                                                                                                                                                                                                                                                                                                                                                                                                                                                                                                                                                |
|                               |                                                                                                                                                                                                                                                                                                                                                                                                                                                                                                                                                                                                                                                                                                                      |

SCHOLARONE™  
Manuscripts

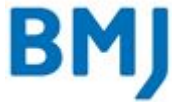

I, the Submitting Author has the right to grant and does grant on behalf of all authors of the Work (as defined in the below author licence), an exclusive licence and/or a non-exclusive licence for contributions from authors who are: i) UK Crown employees; ii) where BMJ has agreed a CC-BY licence shall apply, and/or iii) in accordance with the terms applicable for US Federal Government officers or employees acting as part of their official duties; on a worldwide, perpetual, irrevocable, royalty-free basis to BMJ Publishing Group Ltd ("BMJ") its licensees and where the relevant Journal is co-owned by BMJ to the co-owners of the Journal, to publish the Work in this journal and any other BMJ products and to exploit all rights, as set out in our [licence](#).

The Submitting Author accepts and understands that any supply made under these terms is made by BMJ to the Submitting Author unless you are acting as an employee on behalf of your employer or a postgraduate student of an affiliated institution which is paying any applicable article publishing charge ("APC") for Open Access articles. Where the Submitting Author wishes to make the Work available on an Open Access basis (and intends to pay the relevant APC), the terms of reuse of such Open Access shall be governed by a Creative Commons licence – details of these licences and which [Creative Commons](#) licence will apply to this Work are set out in our licence referred to above.

Other than as permitted in any relevant BMJ Author's Self Archiving Policies, I confirm this Work has not been accepted for publication elsewhere, is not being considered for publication elsewhere and does not duplicate material already published. I confirm all authors consent to publication of this Work and authorise the granting of this licence.

1  
2  
3  
4 **Factors predicting successful vaginal birth after caesarean section: protocol for**  
5 **evidence-based consensus recommendations using a Delphi survey**  
6  
7

8  
9 Weiyong Zhu<sup>1</sup>, Ling Ai<sup>1#</sup>, Ying Feng<sup>1</sup>, Haiyan Yuan<sup>1</sup>, Yu Wang<sup>2</sup>, Meitang Wang<sup>3#</sup>,  
10 Zubing Mei<sup>4, 5#</sup>  
11  
12  
13

- 14  
15 1. Obstetric Department of Jiaying Maternity and Children Health Care Hospital,  
16 Jiaying University, Wenzhou Medical University Affiliated Hospital of  
17 Women and Children, Jiaying, 314000, China  
18  
19 2. Science and Education Division of Jiaying Maternity and Children Health  
20 Care Hospital, Jiaying University, Wenzhou Medical University Affiliated  
21 Hospital of Women and Children, Jiaying, 314000, China  
22  
23 3. Emergency Department, Changhai Hospital, Navy Medical University,  
24 Shanghai, 200433, China.  
25  
26 4. Department of Anorectal Surgery, Shuguang Hospital, Shanghai University of  
27 Traditional Chinese Medicine, Shanghai, 201203, China;  
28  
29 5. Anorectal Disease Institute of Shuguang Hospital, Shanghai, 201203, China.  
30  
31  
32  
33

34 **Correspondence to:**

35  
36 Dr. Ling Ai

37  
38  
39 Obstetric Department of Jiaying Maternity and Children Health Care Hospital,  
40  
41 Jiaying University, Wenzhou Medical University Affiliated Hospital of Women and  
42  
43 Children  
44

45  
46 No.2468 East Central Road, South lake district, Jiaying, 314000, China  
47

48  
49 Tel: 086 13736836830  
50

51  
52 E-mail:13736836830@163.com  
53  
54  
55

56  
57 Dr. Meitang Wang,

58  
59 Emergency Department, Changhai Hospital, Navy Medical University, Shanghai,  
60

1  
2  
3  
4 168 Changhai Road, Shanghai 200433, China.  
5

6  
7 Tel: 86- 189 3010 3301;  
8

9 E-mail: wmt88@sina.com  
10  
11  
12  
13

14 Dr. Zubing Mei, MD, PhD  
15

16 Department of Anorectal Surgery, Shuguang Hospital, Shanghai University of  
17 Traditional Chinese Medicine; Anorectal Disease Institute of Shuguang Hospital  
18  
19 528 Zhangheng Road, Shanghai 201203, China  
20

21  
22 Tel: 086-2120256187  
23

24 E-mail: herrmayor@126.com  
25  
26  
27  
28  
29  
30

31 **Running head:** Delphi survey of factors predicting successful VBAC  
32

33 **Abstract Word Count:** 297  
34

35 **Word Count (excluding abstract):** 2050  
36  
37

38 **References:** 53  
39

40 **Figure:** 1  
41  
42

43 **Table:** 1  
44  
45  
46  
47  
48

49 **Key words:** vaginal birth after caesarean section (VBAC), predictive factors,  
50 systematic review, Delphi survey, evidence-based consensus  
51  
52  
53  
54  
55  
56

57 **Funding statement:** This work was supported by Minsheng Special Project of  
58 Scientific and Technological Innovation of Jiaxing City (grant no. 2019AD32061), the  
59  
60

1  
2  
3  
4 National Natural Science Foundation of China (grant no. 81774112), a grant from  
5  
6 Siming Scholars from Shuguang Hospital (grant no. SGXZ-201913).  
7  
8  
9  
10  
11  
12

13 **Author contributions:**

14  
15 Dr. Weiyong Zhu had full access to all of the data in the study and takes responsibility  
16  
17 for the integrity of the data and the accuracy of the data analysis.  
18

19  
20 Study concept and design: Ling Ai, Weiyong Zhu and Zubing Mei.  
21

22  
23 Acquisition, analysis, or interpretation of data: Weiyong Zhu, Ling Ai, Ying Feng,  
24  
25 Haiyan Yuan, Yu Wang, and Meitang Wang.  
26

27  
28 Drafting of the manuscript: Weiyong Zhu, Zubing Mei.  
29

30  
31 Critical revision of the manuscript for important intellectual content: All authors.  
32

33  
34 Statistical analysis: Zubing Mei, Ling Ai  
35

36  
37 Administrative, technical, or material support: All authors.  
38

39  
40 Study supervision: Zubing Mei.  
41  
42  
43

44 **Competing interests statement:**

45  
46 The authors declare that they have no conflict of interest.  
47  
48  
49  
50

51 **Role of the Funder/Sponsor:**

52  
53 The funder of the study had no role in the study design, data collection, data analysis,  
54  
55 data interpretation or writing of the manuscript. The corresponding author had full  
56  
57  
58  
59  
60

1  
2  
3  
4  
5  
6  
7  
8  
9  
10  
11  
12  
13  
14  
15  
16  
17  
18  
19  
20  
21  
22  
23  
24  
25  
26  
27  
28  
29  
30  
31  
32  
33  
34  
35  
36  
37  
38  
39  
40  
41  
42  
43  
44  
45  
46  
47  
48  
49  
50  
51  
52  
53  
54  
55  
56  
57  
58  
59  
60

access to all the data in the study and has final responsibility for the decision to  
submit for publication.

For peer review only

## **Abstract**

### **Introduction**

With the wide adoption of the two-child policy in China since 2016, a large percentage of women with a history of caesarean delivery plan to have a second child. Accordingly, the rate of Vaginal Birth after Cesarean Delivery (VBAC) is increasing. Women attempting repeat VBAC may experience multiple morbidities, which is also one of the leading causes of maternal and perinatal mortality. However, it remains far below expectations how to evaluate successful VBAC. This study aims to use a novel approach to identify a set of predictive factors for successful VBAC to be included in prediction models. We plan to validate these predicting factors collected through a comprehensive literature review combined with a two-round international Delphi survey.

### **Methods and analysis**

This study will apply a methodology through an evidence-based approach. A long list of potential prediction factors for successful VBAC will be extracted and identified through the following stages: First, a systematic review of the published literature will be conducted to extract candidate factors that contribute to the successful VBAC. The online questionnaires will be developed in the field of patient, maternal and fetal-related factors. A two-round international Delphi survey will be distributed to the expert panel in the field of perinatal medicine using Google Forms. Experts will be asked to score each factor using the 9-point Likert rating scale to establish core



1  
2  
3  
4 predictive factors for the successful VBAC. The expert panel will determine on  
5  
6 whether to include, potentially include, or exclude predictive factors, based on the  
7  
8  
9 GRADE approach and the Delphi method.  
10  
11  
12  
13

#### 14 **Ethics and dissemination**

15  
16  
17 The study was approved by the Institutional Review Board of the Jiaying Maternity  
18  
19 and Children Health Care Hospital (approval number: 2019-79). The results of this  
20  
21 study will be submitted to international peer-reviewed journals or conferences in  
22  
23 perinatal medicine or obstetrics.  
24  
25  
26  
27  
28  
29

#### 30 **Trial registration number**

31  
32 Open Science Framework (OSF): DOI 10.17605/OSF.IO/8D6XY.  
33  
34  
35  
36  
37

#### 38 **Key words**

39  
40 Vaginal birth after caesarean section (VBAC), predictive factors, systematic review,  
41  
42  
43 Delphi survey, evidence-based consensus  
44  
45  
46  
47  
48  
49  
50  
51  
52  
53  
54  
55  
56  
57  
58  
59  
60

### Strengths and limitations of this study

- This is the first novel mixed methods used to select predictive factors for successful vaginal birth after cesarean delivery (VBAC) for obstetric patients.
- Predictive factors for successful VBAC will be identified through the combination of a systematic review and Delphi process.
- The consensus on determination of predictive factors for successful VBAC will be based on a two-round Delphi survey among international obstetric experts.
- A Delphi survey-based expert judgment will be made to include or exclude predictive factors for successful VBAC.

## **Introduction**

The overall cesarean delivery (CD) rates have accelerated significantly globally in recent years.<sup>1</sup> It has been reported that successful vaginal birth after cesarean delivery (VBAC) reduces morbidity or complications compared to an elective repeat CD.<sup>2</sup>

In China, with the wide adoption of the two-child policy since 2016, a large percentage of women with a history of CD plan to have a second child.

Therefore, a trial of labor after one cesarean (TOLAC) is encouraged in some countries to reduce CD rates and associated maternal adverse outcomes.<sup>3-5</sup>

Studies have shown that CD after an unsuccessful TOLAC may lead to increased bleeding, postoperative infection, endometritis and increased health care expenditure.<sup>6-9</sup>

It is crucial to determine the protective and risk factors for an obstetrician to decide on a woman's chance for successful VBAC based on the patients baseline characteristics.

Several studies have reported that patient- related demographic characteristics (patient race and ethnicity, education level and gestational week),<sup>10 11</sup> maternal factors (maternal age, body mass index and bishop score)<sup>12 13</sup> and fetal factors (estimated birth weight)<sup>14</sup> that may be associated with a woman's chance for successful VBAC. Some predictive models for successful VBAC have also been published in recent years.<sup>2 12 15</sup> However, the quality of these models varied considerably in terms of study design, enrolled patients, model internal and external validity, which make the applicability domain of the model rather dubious.

1  
2  
3  
4  
5  
6  
7 The aim of this study is to use a novel approach to identify a set of predictive factors  
8  
9 for success of VBAC to be included in prediction models. We plan to validate these  
10  
11 predicting variables collected through a comprehensive literature review combined  
12  
13 with an international two-round Delphi survey.  
14  
15  
16  
17  
18

### 19 **Ethics**

20  
21  
22 The study was approved by the Institutional Review Board of the Jiaying Maternity  
23  
24 and Children Health Care Hospital.  
25  
26  
27  
28  
29

### 30 **Study design**

31  
32 We will carry out a study that combines a comprehensive systematic review and an  
33  
34 evaluation of the certainty of the evidence based on Grading of Recommendations  
35  
36 Assessment, Development, and Evaluation (GRADE) approach.<sup>16</sup> As demonstrated in  
37  
38 the flowchart (Figure 1), a structured Delphi survey-based expert judgment will be  
39  
40 made to include or exclude predictive factors for successful VBAC.  
41  
42  
43  
44  
45  
46  
47

### 48 **Systematic literature review**

49  
50 The systematic review will be performed based on the Preferred Reporting Items for  
51  
52 Systematic Reviews and Meta-analyses (PRISMA) guidelines,<sup>17</sup> and aims to update  
53  
54 all potential predictive factors for successful VBAC in hospitalised obstetric patients,  
55  
56 the search strategy of which is described in detail in Table 1. In summary, we will  
57  
58  
59  
60

1  
2  
3  
4 search Pubmed, EMBASE, Cochrane Library and SinoMed from inception to  
5  
6 November, 2020. Predictive factors and prediction model studies will be selected that  
7  
8 report potential predictive factors for successful VBAC in hospitalised obstetric  
9  
10 patients. We define successful VBAC as a successful vaginal delivery after a previous  
11  
12 cesarean section. Two independent reviewers will screen the articles for eligibility and  
13  
14 extract the data after duplicated citations are removed. Then the GRADE approach  
15  
16 will be applied to assess and rate the certainty of the evidence independently.<sup>16</sup>  
17  
18  
19  
20  
21  
22 The results of the systematic review will provide the basis to develop a framework for  
23  
24 voting in the two-round international Delphi survey.  
25  
26  
27  
28  
29

30  
31 When the systematic review is finished, we will hold a face-to-face meeting among  
32  
33 the research team to discuss the main findings of the systematic review. Through the  
34  
35 discussion, we will judge which predictive factors should be included in the Delphi  
36  
37 process. The results will be presented with forest plots for each meta-analysis  
38  
39 combined with the effect estimates and their confidence intervals. We will also  
40  
41 evaluate the evidence of the observational studies which will be graded into  
42  
43 high-quality, moderate-quality and low-quality evidence according to Egger's P value,  
44  
45 total sample size and between-study heterogeneity as recommended by Mei et al.<sup>18</sup>  
46  
47  
48  
49  
50 After grading the evidence, the research team members will discuss the feasibility and  
51  
52 acceptability of the potential predictive factors included in the Delphi survey, which  
53  
54 will be categorised into 3 groups: included, potentially included, and excluded  
55  
56 predictive factors, the method of which was recommended by Darzi, et al.<sup>19</sup> The  
57  
58  
59  
60

1  
2  
3  
4 included predictive factors are defined as those that should be included in the future  
5  
6 prediction model. The potentially included predictive factors are defined as candidates  
7  
8 that will potentially be included in the future prediction model. The excluded  
9  
10 predictive factors are those that will not be considered to be included in the prediction  
11  
12  
13  
14 model.  
15  
16

### 17 18 19 **Expert panel participants**

20  
21  
22 The expert panel will be selected from all over the world including obstetricians and  
23  
24 senior researchers with expertise in management of obstetric or perinatal  
25  
26 complications in hospitalised obstetric patients, and in the development, validation,  
27  
28 and application of predictive models for clinical practice. Panel experts will  
29  
30 participate in a web-based panel conference, complete surveys and questionnaires, if  
31  
32 necessary, will also provide feedback on reports. They will disclose that they do not  
33  
34 have any conflicts of interest and then complete the declaration-of-interest forms to  
35  
36 avoid any potentially existing conflicts regarding the existing predictive models and  
37  
38 other factors. We anticipate that at least 20 representatives from the expert panel with  
39  
40 at least five representatives from each of international association will be included.  
41  
42  
43  
44  
45  
46  
47  
48  
49

50 We will select members of the expert panel by using the following predesigned  
51  
52 criteria:  
53

- 54  
55  
56 1) First or corresponding authors of a journal article on predictive factors for  
57  
58 successful VBAC in hospitalised obstetric patients.  
59  
60

- 1
- 2
- 3
- 4 2) Representative members from International Federation of Gynaecologists and
- 5
- 6 Obstetricians (FIGO), the American College of Obstetricians and Gynecologists
- 7
- 8 (ACOG), the Royal College of Obstetricians and Gynaecologists (RCOG), and
- 9
- 10 Chinese Obstetricians and Gynecologists Association (COGA).
- 11
- 12
- 13
- 14 3) Guideline authors of the above mentioned associations of obstetricians and
- 15
- 16 gynecologists.
- 17
- 18
- 19

20 The research team is composed of one senior obstetrician, 2 to 3 resident physicians  
21  
22 working in gynecology and obstetrics, a senior researcher, who will work together to  
23  
24 compile the evidence for presentation, draft the questionnaire for the two-round  
25  
26 Delphi survey, analyse the responses, and summarise the results.  
27  
28  
29  
30

### 31 32 33 **Two-round Delphi survey**

34  
35  
36 A list of predictive factors will be delivered to the expert panel by e-mail in the form  
37  
38 of google form questionnaire, which we summarise based on the results of the  
39  
40 systematic review and identify them finally by group discussion among the research  
41  
42 team members. Each member of expert panel will provide his or her response  
43  
44 independently. Discussions are not allowed among expert panel members. During the  
45  
46 first-round survey, the initial list of predictive factors yielded by the systematic  
47  
48 review will be supplemented with other relevant factors which might be suggested by  
49  
50 the expert panel members. These will constitute all the item list of the first-round  
51  
52 Delphi survey. We initially classify the predictive factors into three categories  
53  
54 according to the literature reports and general knowledge, including patient-related  
55  
56  
57  
58  
59  
60

1  
2  
3  
4 factors (race/ethnicity, level of education, delivery interval and gestational week),  
5  
6 maternal-related factors (maternal age, body mass index, previous vaginal delivery  
7  
8 history and trial of labor after a caesarean delivery history) and fetal-related factors  
9  
10 (estimated fetal weight).  
11  
12  
13  
14  
15  
16

17 The second-round Delphi survey will be designed for the experts to make final  
18  
19 clinical or methodological judgements regarding the predictive factors for successful  
20  
21 VBAC based on the reports of the first-round survey.  
22  
23  
24  
25  
26

27 The expert panel members will be asked to rate the importance of each candidate item  
28  
29 using a 9-point Likert scale, where 1 to 3 means “low importance”, 4 to 6 means “not  
30  
31 critically important” and 7 to 9 means “critical importance”.<sup>20-23</sup> An “unable to rate”  
32  
33 option will also be set. The expert panel members will be instructed to choose “unable  
34  
35 to rate” if they think they do not have adequate knowledge or expertise on a particular  
36  
37 list of statement.<sup>24 25</sup> During the first round, panel members can suggest some more  
38  
39 related items to be incorporated into the second round of survey after discussion by  
40  
41 the research team. Only panel members who have finished the first-round survey can  
42  
43 move to the second-round survey. During the second round, they will be reminded of  
44  
45 what they rated during the first round and will be shown the distribution of responses  
46  
47 across the 1 to 9 scale for each question in the questionnaire. The expert panel  
48  
49 members have the right to retain their first-round scores or rescored for some specific  
50  
51 statements. Both rounds of online voting are anonymous to minimise bias.  
52  
53  
54  
55  
56  
57  
58  
59  
60



## Consensus definition and analysis plan

We will consider consensus to be reached and the predictive factors will be included if more than 70% of panel members score the statement within 7 to 9 (critical importance) or less than 15% of panel members score the statement within 1 to 3 (low importance); or in contrast, the predictive factors will be excluded if more than 70% of panel members score the statement within 1 to 3 (low importance) or less than 15% of panel members score the statement within 7 to 9 (critical importance).

This framework is recommended by the GRADE (Grading of Recommendations Assessment, Development, and Evaluation) group used to assess the importance of evidence. At the end of the questionnaire, we will encourage experts who participate in the survey to add some other potential predictive factors that they think are relevant, and it is better to provide some reasons.

Finally, the panel members' agreement on the factors' importance will be assessed using the Disagreement Index (DI), as described in the RAND/UCLA approach.<sup>26</sup> The DI generally reflects the distribution and symmetry of the scores (ranging from 1 to 9), with a higher DI representing wider spread across the 9-point scale, while lower DI representing increasing consensus. If the DI exceeds 1.0, the distribution is regarded as extreme variation in rated scores, while the DI is less than 1.0, we consider no extreme variation existence, which means that a consensus is reached.

## **Ethics and dissemination**

Information from patients and the public has informed the conception and requirement for this Delphi study as part of an existing programme of research that is centred on lumbar spinal surgery for LBLP and patient outcome.

## **Ethics and dissemination**

Results of this evidence-based international Delphi survey to provide recommended predictive factors will be presented at relevant international conferences, and will be published in peer-reviewed journals. It will provide both obstetricians and researchers with valid and consensus predictors which can be used both in clinical practice and in quality improvement initiatives.

## **Patient and public involvement**

Details from patients and the public have provided the conception and requirement for this Delphi process as one part of the study protocol that is focused on predictive factors of successful VBAC.

## **Discussion**

In this work, we will apply a novel evidence-based approach to systematically identify and assess predictive factors of successful VBAC in hospitalised obstetric patients. We will first conduct an extensive systematic literature review to identify a

1  
2  
3  
4 number of potentially relevant patient, maternal and fetal-related predictive factors  
5  
6 through GRADE approach. We will next develop an international two-round Delphi  
7  
8 survey to reach a consensus among international obstetric experts from 4 international  
9  
10 obstetricians and gynecologists associations of the world (FIGO, ACOG, RCOG and  
11  
12 COGA) on the importance of the selected factors. Our ultimate purpose of this study  
13  
14 is to reach evidence-based consensus on the predictive factors of successful VBAC  
15  
16 used for future international prediction model development for successful VBAC. At  
17  
18 the moment, there are no validated prediction models for successful VBAC based on  
19  
20 large prospective cohort studies.  
21  
22  
23  
24  
25  
26  
27  
28  
29

### 30 **Strengths and limitations**

31  
32 Our study has several strengths due to its rigorous methods that are robust and  
33  
34 reproducible for several reasons. First, our systematic review will be conducted based  
35  
36 on the PRISMA guidelines.<sup>17</sup> The search strategy is most comprehensive compared  
37  
38 with the previously ones.<sup>11 27</sup> Secondly, we will apply the GRADE approach to assess  
39  
40 the certainty of evidence, which is a most solid method for decision making in several  
41  
42 aspects, including for the development of future clinical guidelines.<sup>16</sup> Thirdly, our  
43  
44 research team will provide objective suggestions to identify all potential predictive  
45  
46 factors for successful VBAC. Fourthly, the consensus regarding the issue will be  
47  
48 based on a two-round Delphi survey among international obstetric experts from  
49  
50 multiple international obstetrician and gynecologist associations of the world, making  
51  
52 the results more convincing. Moreover, the two-round Delphi survey will be  
53  
54  
55  
56  
57  
58  
59  
60

1  
2  
3  
4 completely anonymous to reduce bias to the greatest extent. These set of methods will  
5  
6 guarantee the internal and external validity of the study results.  
7  
8  
9

10  
11 There are limitations to this study as well. Firstly, the quality of the included studies  
12  
13 varied considerably because most of the studies are observational cohort studies, and  
14  
15 some are retrospective in study design. Secondly, the statements of Delphi survey to  
16  
17 be developed are generally brief in nature. Some unknown domains related to the  
18  
19 predictive factors may not be involved and addressed adequately. Thirdly, some of the  
20  
21 experts involved in the Delphi survey will be clinical researchers instead of  
22  
23 obstetricians, and they might lack knowledge regarding certain aspects of factors for  
24  
25 successful of VBAC. Fourthly, though representative participants will be enrolled as  
26  
27 expert panel in the Delphi survey mainly from Europe, USA and China, the experts do  
28  
29 not cover the whole global regions, which may lead to a selection bias, and the results  
30  
31 could not be applicable to regions outside Europe, USA and China.  
32  
33  
34  
35  
36  
37  
38  
39  
40  
41  
42

43 In summary, this study protocol summarises the design of validation of studies  
44  
45 predicting factors collected through a comprehensive literature review combined with  
46  
47 a two-round international Delphi survey . The results from this study will be  
48  
49 interpreted for the purpose of clinical decision making for obstetricians to determine  
50  
51 the suitable patients for VBAC.  
52  
53  
54  
55  
56  
57  
58  
59  
60

## References

1. Denham SH, Humphrey T, deLabrusse C, et al. Mode of birth after caesarean section: individual prediction scores using Scottish population data. *BMC pregnancy and childbirth* 2019;19(1):84.
2. Baranov A, Salvesen K, Vikhareva O. Validation of prediction model for successful vaginal birth after Cesarean delivery based on sonographic assessment of hysterotomy scar. *Ultrasound in Obstetrics & Gynecology* 2018;51(2):189-93.
3. Obstetricians ACo, Gynecologists. Vaginal birth after cesarean delivery. ACOG Practice Bulletin No. 184. *Obstetrics and Gynecology* 2017;130(5):e217-e33.
4. No RRG-tG. 45: Birth After Previous Caesarean Birth. *Royal College of Obstetrician and Gynaecologists* 2015
5. Vaginal birth after cesarean: New insights. In National Institutes of Health Consensus Development Conference; 2010.
6. El-Sayed YY, Watkins MM, Fix M, et al. Perinatal outcomes after successful and failed trials of labor after cesarean delivery. *American journal of obstetrics and gynecology* 2007;196(6):583. e1-83. e5.
7. Guise J-M, Denman MA, Emeis C, et al. Vaginal birth after cesarean: new insights on maternal and neonatal outcomes. *Obstetrics & Gynecology* 2010;115(6):1267-78.
8. McMahon MJ, Luther ER, Bowes Jr WA, et al. Comparison of a trial of labor with an elective second cesarean section. *New England journal of medicine* 1996;335(10):689-95.
9. Suarez-Easton S, Zafran N, Garmi G, et al. Postcesarean wound infection: prevalence, impact, prevention, and management challenges. *International journal of women's health* 2017;9:81.
10. Lehmann S, Baghestan E, Børdahl PE, et al. Low risk pregnancies after a cesarean section: Determinants of trial of labor and its failure. *PloS one* 2020;15(1):e0226894.
11. Wu Y, Kataria Y, Wang Z, et al. Factors associated with successful vaginal birth after a cesarean section: a systematic review and meta-analysis. *BMC pregnancy and childbirth* 2019;19(1):1-12.
12. Manzanares S, Ruiz-Duran S, Pinto A, et al. An integrated model with classification criteria to predict vaginal delivery success after cesarean section. *The Journal of Maternal-Fetal & Neonatal Medicine* 2020;33(2):236-42.
13. Minsart A-F, Liu H, Moffett S, et al. Vaginal birth after caesarean delivery in Chinese women and Western immigrants in Shanghai. *Journal of Obstetrics and Gynaecology* 2017;37(4):446-49.
14. Smithies M, Woolcott CG, Brock J-AK, et al. Factors associated with trial of labour and mode of delivery in Robson Group 5: A select group of women with previous caesarean section. *Journal of Obstetrics and Gynaecology Canada* 2018;40(6):704-11.

15. Mooney SS, Hiscock R, Clarke IDA, et al. Estimating success of vaginal birth after caesarean section in a regional Australian population: Validation of a prediction model. *Australian and New Zealand Journal of Obstetrics and Gynaecology* 2019;59(1):66-70.
16. Balshem H, Helfand M, Schünemann HJ, et al. GRADE guidelines: 3. Rating the quality of evidence. *Journal of clinical epidemiology* 2011;64(4):401-06.
17. Moher D, Liberati A, Tetzlaff J, et al. Preferred reporting items for systematic reviews and meta-analyses: the PRISMA statement. *PLoS medicine* 2009;6(7):e1000097. doi: 10.1371/journal.pmed.1000097 [published Online First: 2009/07/22]
18. Mei Z, Wang Q, Zhang Y, et al. Risk factors for recurrence after anal fistula surgery: a meta-analysis. *International Journal of Surgery* 2019;69:153-64.
19. Darzi AJ, Karam SG, Spencer FA, et al. Risk models for VTE and bleeding in medical inpatients: systematic identification and expert assessment. *Blood advances* 2020;4(12):2557-66. doi: 10.1182/bloodadvances.2020001937 [published Online First: 2020/06/17]
20. Xu Q, Huang Y, Chen B. Comprehensive assessment of health education and health promotion in five non-communicable disease demonstration districts in China: a cross-sectional study. *BMJ open* 2017;7(12):e015943. doi: 10.1136/bmjopen-2017-015943 [published Online First: 2017/12/29]
21. Mrowietz U, de Jong EM, Kragballe K, et al. A consensus report on appropriate treatment optimization and transitioning in the management of moderate-to-severe plaque psoriasis. *Journal of the European Academy of Dermatology and Venereology : JEADV* 2014;28(4):438-53. doi: 10.1111/jdv.12118 [published Online First: 2013/02/27]
22. Suzuki Y, Fukasawa M, Nakajima S, et al. Development of disaster mental health guidelines through the Delphi process in Japan. *International journal of mental health systems* 2012;6(1):7. doi: 10.1186/1752-4458-6-7 [published Online First: 2012/07/04]
23. Konstantinou K, Hider SL, Vogel S, et al. Development of an assessment schedule for patients with low back-associated leg pain in primary care: a Delphi consensus study. *European spine journal : official publication of the European Spine Society, the European Spinal Deformity Society, and the European Section of the Cervical Spine Research Society* 2012;21(7):1241-9. doi: 10.1007/s00586-011-2057-2 [published Online First: 2011/11/05]
24. Williamson PR, Altman DG, Blazeby JM, et al. Developing core outcome sets for clinical trials: issues to consider. *Trials* 2012;13:132. doi: 10.1186/1745-6215-13-132 [published Online First: 2012/08/08]
25. Teoh JY, MacLennan S, Chan VW, et al. An International Collaborative Consensus Statement on En Bloc Resection of Bladder Tumour Incorporating Two Systematic Reviews, a Two-round Delphi Survey, and a Consensus Meeting. *European urology* 2020;78(4):546-69. doi: 10.1016/j.eururo.2020.04.059 [published Online First: 2020/05/12]

- 1  
2  
3 26. Danese S, Bonovas S, Lopez A, et al. Identification of Endpoints for Development  
4 of Antifibrosis Drugs for Treatment of Crohn's Disease. *Gastroenterology*  
5 2018;155(1):76-87. doi: 10.1053/j.gastro.2018.03.032 [published Online First:  
6 2018/03/31]  
7  
8 27. Wingert A, Hartling L, Sebastiani M, et al. Clinical interventions that influence  
9 vaginal birth after cesarean delivery rates: Systematic Review &  
10 Meta-Analysis. *BMC pregnancy and childbirth* 2019;19(1):529. doi:  
11 10.1186/s12884-019-2689-5 [published Online First: 2020/01/01]  
12  
13  
14  
15  
16  
17  
18  
19  
20  
21  
22  
23  
24  
25  
26  
27  
28  
29  
30  
31  
32  
33  
34  
35  
36  
37  
38  
39  
40  
41  
42  
43  
44  
45  
46  
47  
48  
49  
50  
51  
52  
53  
54  
55  
56  
57  
58  
59  
60

For peer review only

**Table 1.** Search strategy for Pubmed.

|                                                                                                                                                                                                  |
|--------------------------------------------------------------------------------------------------------------------------------------------------------------------------------------------------|
| 1. "Vaginal Birth after Cesarean"[Mesh]                                                                                                                                                          |
| 2. "Trial of Labor"[Mesh]                                                                                                                                                                        |
| 3. "Cesarean Section, Repeat"[Mesh]                                                                                                                                                              |
| 4. "Cesarean Section"[Mesh]                                                                                                                                                                      |
| 5. 1-4/OR                                                                                                                                                                                        |
| 6. 'Vaginal Birth after Cesarean' OR VBAC OR 'trial of labor' OR 'cesarean section' OR TOLAC OR 'vaginal birth*' OR 'vaginal deliver*' OR 'trial of labour' OR 'active labor' OR 'active labour' |
| 7. 5 OR 6                                                                                                                                                                                        |

**Figure legend****Figure 1.** Flowchart of the study design.



1  
2  
3  
4  
5  
6  
7  
8  
9  
10  
11  
12  
13  
14  
15  
16  
17  
18  
19  
20  
21  
22  
23  
24  
25  
26  
27  
28  
29  
30  
31  
32  
33  
34  
35  
36  
37  
38  
39  
40  
41  
42  
43  
44  
45  
46  
47  
48  
49  
50  
51  
52  
53  
54  
55  
56  
57  
58  
59  
60

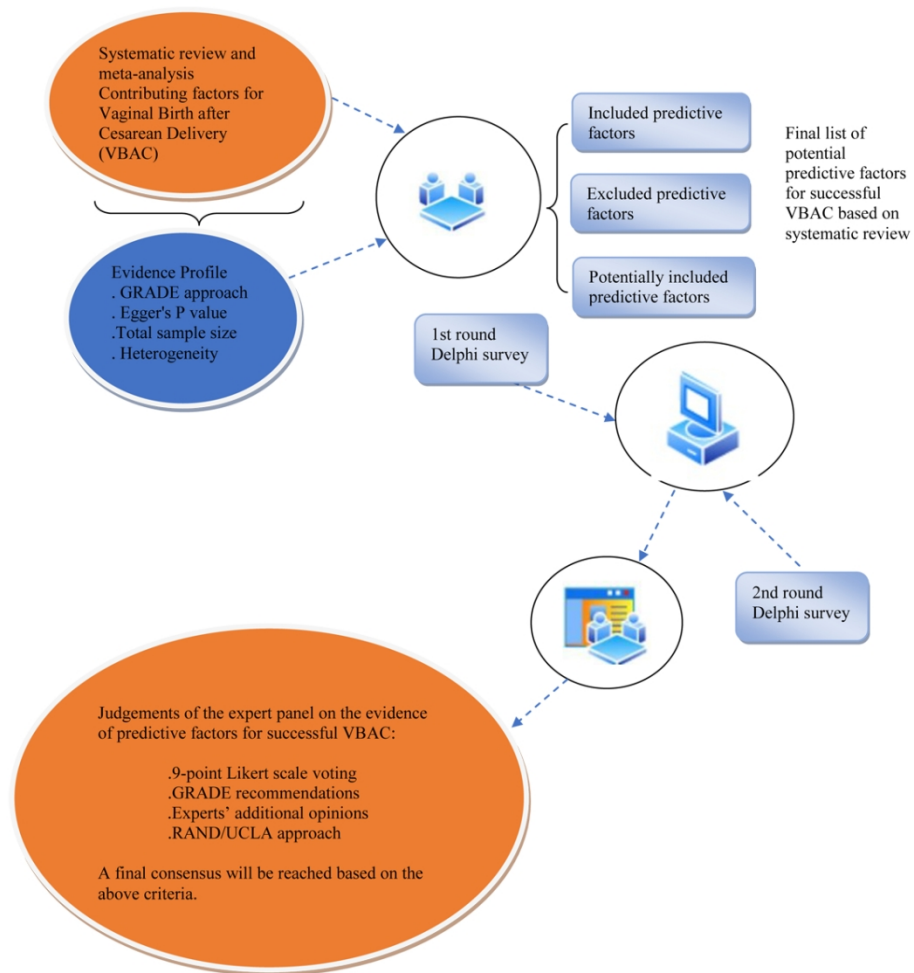

Figure 1. Flowchart of the study design.

# BMJ Open

## Factors predicting successful vaginal birth after caesarean section: protocol for evidence-based consensus recommendations using a Delphi survey

|                                 |                                                                                                                                                                                                                                                                                                                                                                                                                                                                                                                                                                                                                                                                                                                      |
|---------------------------------|----------------------------------------------------------------------------------------------------------------------------------------------------------------------------------------------------------------------------------------------------------------------------------------------------------------------------------------------------------------------------------------------------------------------------------------------------------------------------------------------------------------------------------------------------------------------------------------------------------------------------------------------------------------------------------------------------------------------|
| Journal:                        | <i>BMJ Open</i>                                                                                                                                                                                                                                                                                                                                                                                                                                                                                                                                                                                                                                                                                                      |
| Manuscript ID                   | bmjopen-2020-047433.R1                                                                                                                                                                                                                                                                                                                                                                                                                                                                                                                                                                                                                                                                                               |
| Article Type:                   | Protocol                                                                                                                                                                                                                                                                                                                                                                                                                                                                                                                                                                                                                                                                                                             |
| Date Submitted by the Author:   | 04-Mar-2021                                                                                                                                                                                                                                                                                                                                                                                                                                                                                                                                                                                                                                                                                                          |
| Complete List of Authors:       | Zhu, Weiyang ; Jiaxing University, Obstetric Department of Jiaxing Maternity and Children Health Care Hospital<br>Ai, Ling ; Jiaxing University, Obstetric Department of Jiaxing Maternity and Children Health Care Hospital<br>Feng, Ying ; Jiaxing University, Obstetric Department of Jiaxing Maternity and Children Health Care Hospital<br>Yuan, Haiyan ; Jiaxing University, Obstetric Department of Jiaxing Maternity and Children Health Care Hospital<br>Wang, Yu ; Jiaxing University, Science and Education Division of Jiaxing Maternity and Children Health Care Hospital<br>Wang, Meitang ; Changhai Hospital, Emergency Department<br>Mei, Zubing; Shuguang Hospital, Department of Anorectal Surgery |
| <b>Primary Subject Heading</b>: | Obstetrics and gynaecology                                                                                                                                                                                                                                                                                                                                                                                                                                                                                                                                                                                                                                                                                           |
| Secondary Subject Heading:      | Evidence based practice                                                                                                                                                                                                                                                                                                                                                                                                                                                                                                                                                                                                                                                                                              |
| Keywords:                       | OBSTETRICS, PREVENTIVE MEDICINE, Protocols & guidelines < HEALTH SERVICES ADMINISTRATION & MANAGEMENT                                                                                                                                                                                                                                                                                                                                                                                                                                                                                                                                                                                                                |
|                                 |                                                                                                                                                                                                                                                                                                                                                                                                                                                                                                                                                                                                                                                                                                                      |

SCHOLARONE™  
Manuscripts



I, the Submitting Author has the right to grant and does grant on behalf of all authors of the Work (as defined in the below author licence), an exclusive licence and/or a non-exclusive licence for contributions from authors who are: i) UK Crown employees; ii) where BMJ has agreed a CC-BY licence shall apply, and/or iii) in accordance with the terms applicable for US Federal Government officers or employees acting as part of their official duties; on a worldwide, perpetual, irrevocable, royalty-free basis to BMJ Publishing Group Ltd ("BMJ") its licensees and where the relevant Journal is co-owned by BMJ to the co-owners of the Journal, to publish the Work in this journal and any other BMJ products and to exploit all rights, as set out in our [licence](#).

The Submitting Author accepts and understands that any supply made under these terms is made by BMJ to the Submitting Author unless you are acting as an employee on behalf of your employer or a postgraduate student of an affiliated institution which is paying any applicable article publishing charge ("APC") for Open Access articles. Where the Submitting Author wishes to make the Work available on an Open Access basis (and intends to pay the relevant APC), the terms of reuse of such Open Access shall be governed by a Creative Commons licence – details of these licences and which [Creative Commons](#) licence will apply to this Work are set out in our licence referred to above.

Other than as permitted in any relevant BMJ Author's Self Archiving Policies, I confirm this Work has not been accepted for publication elsewhere, is not being considered for publication elsewhere and does not duplicate material already published. I confirm all authors consent to publication of this Work and authorise the granting of this licence.

1  
2  
3  
4 **Factors predicting successful vaginal birth after caesarean section: protocol for**  
5 **evidence-based consensus recommendations using a Delphi survey**  
6  
7

8  
9 Weiyong Zhu<sup>1</sup>, Ling Ai<sup>1#</sup>, Ying Feng<sup>1</sup>, Haiyan Yuan<sup>1</sup>, Yu Wang<sup>2</sup>, Meitang Wang<sup>3</sup>,  
10 Zubing Mei<sup>4, 5#</sup>  
11  
12

- 13  
14  
15 1. Obstetric Department of Jiaying Maternity and Children Health Care Hospital,  
16 Jiaying University, Wenzhou Medical University Affiliated Hospital of  
17 Women and Children, Jiaying, 314000, China  
18  
19 2. Science and Education Division of Jiaying Maternity and Children Health  
20 Care Hospital, Jiaying University, Wenzhou Medical University Affiliated  
21 Hospital of Women and Children, Jiaying, 314000, China  
22  
23 3. Emergency Department, Changhai Hospital, Navy Medical University,  
24 Shanghai, 200433, China.  
25  
26 4. Department of Anorectal Surgery, Shuguang Hospital, Shanghai University of  
27 Traditional Chinese Medicine, Shanghai, 201203, China;  
28  
29 5. Anorectal Disease Institute of Shuguang Hospital, Shanghai, 201203, China.  
30  
31  
32  
33

34 **Correspondence to:**

35  
36 Dr. Ling Ai

37  
38  
39 Obstetric Department of Jiaying Maternity and Children Health Care Hospital,  
40  
41 Jiaying University, Wenzhou Medical University Affiliated Hospital of Women and  
42  
43 Children  
44

45  
46 No.2468 East Central Road, South lake district, Jiaying, 314000, China  
47

48  
49 Tel: 086 13736836830  
50

51  
52 E-mail:13736836830@163.com  
53  
54

55  
56 Dr. Zubing Mei, MD, PhD  
57  
58  
59  
60

1  
2  
3  
4 Department of Anorectal Surgery, Shuguang Hospital, Shanghai University of  
5 Traditional Chinese Medicine; Anorectal Disease Institute of Shuguang Hospital  
6  
7 528 Zhangheng Road, Shanghai 201203, China  
8  
9 Tel: 086-2120256187  
10  
11 E-mail: herrmayor@126.com  
12  
13  
14  
15  
16  
17  
18

19 **Running head:** Delphi survey of factors predicting successful VBAC  
20  
21  
22

23  
24 **Count**

25  
26 **Abstract Word Count:** 297  
27

28  
29 **Word Count (excluding abstract):** 2566  
30

31  
32 **References:** 34  
33

34  
35 **Figure:** 1  
36

37  
38 **Table:** 1  
39  
40  
41

42 **Key words:**

43  
44  
45 vaginal birth after caesarean section (VBAC), predictive factors, systematic review,  
46  
47 Delphi survey, evidence-based consensus  
48  
49  
50  
51  
52  
53  
54  
55  
56  
57  
58  
59  
60

## **Abstract**

### **Introduction**

With the wide adoption of the two-child policy in China since 2016, a large percentage of women with a history of caesarean delivery (CD) plan to have a second child. Accordingly, the rate of vaginal birth after caesarean delivery (VBAC) is increasing. Women attempting repeat VBAC may experience multiple morbidities, which is also one of the leading causes of maternal and perinatal mortality. However, it remains to be addressed how we evaluate factors for successful VBAC. This study aims to use a novel approach to identify a set of potential predictive factors for successful VBAC, especially for Chinese women, to be included in prediction models which can be most applicable to pregnant women in China. We plan to assess all potential predictive factors collected through a comprehensive literature review. Then the certainty of the evidence for the identified potential predictive factors will be assessed using the Grading of Recommendations Assessment, Development, and Evaluation (GRADE) process. Finally, a two-round international Delphi survey will be conducted to determine the level of consensus.

### **Methods and analysis**

This study will apply a methodology through an evidence-based approach. A long list of potential predictive factors for successful VBAC will be extracted and identified through the following stages: First, an up-to-date systematic review of the published literature will be conducted to extract identified potential predictive factors for

1  
2  
3  
4 successful VBAC. Second, an online Delphi survey will be performed to achieve  
5  
6 expert consensus on which factors should be included in future prediction models.  
7  
8  
9 The online questionnaires will be developed in the field of patient, maternal and  
10  
11 fetal-related factors. A two-round international Delphi survey will be distributed to  
12  
13 the expert panel in the field of perinatal medicine using Google Forms. Experts will  
14  
15 be asked to score each factor using the 9-point Likert rating scale to establish potential  
16  
17 predictive factors for the successful VBAC. The expert panel will determine on  
18  
19 whether to include, potentially include, or exclude predictive factors, based on a  
20  
21 systematic review of clinical evidence and the Delphi method.  
22  
23  
24  
25

### 26 27 **Ethics and dissemination**

28  
29 The study was approved by the Institutional Review Board of the Jiaying Maternity  
30  
31 and Children Health Care Hospital (approval number: 2019-79). The results of this  
32  
33 study will be submitted to international peer-reviewed journals or conferences in  
34  
35 perinatal medicine or obstetrics.  
36  
37  
38  
39  
40  
41  
42

### 43 **Trial registration number**

44  
45 Open Science Framework (OSF): DOI 10.17605/OSF.IO/8D6XY.  
46  
47  
48  
49

### 50 **Key words**

51  
52 Vaginal birth after caesarean section (VBAC), predictive factors, systematic review,  
53  
54 Delphi survey, evidence-based consensus  
55  
56  
57  
58  
59  
60

### Strengths and limitations of this study

- This study aims to use a mixed methods approach to select potential predictive factors for successful vaginal birth after caesarean section (VBAC) for obstetric patients.
- Potential predictive factors for successful VBAC will be identified through a combination of a systematic literature review and a modified Delphi process.
- The consensus on the potential predictive factors for successful VBAC will be achieved based on a two-round Delphi survey among international experts in the field of obstetrics.
- The expert panel will determine whether to include, potentially include, or exclude the candidate predictive factors, based on the GRADE approach and the Delphi method.



## **Introduction**

The overall cesarean delivery (CD) rates have accelerated significantly globally in recent years.<sup>1</sup> Though successful vaginal birth after cesarean delivery (VBAC) has been reported to reduce morbidity or complications compared to an elective repeat CD,<sup>2</sup> recent evidence has continued to highlight the risks of VBAC.<sup>3</sup> In China, with the wide adoption of the two-child policy since 2016, a large percentage of women with a history of CD plan to have a second child and an elective repeat CD can be a suitable choice. However, a trial of labor after one cesarean (TOLAC) is encouraged in some countries which has been reported to reduce maternal adverse outcomes.<sup>4-6</sup> Studies have also shown that CD after an unsuccessful TOLAC may lead to increased bleeding, postoperative infection, endometritis and increased health care expenditure.<sup>7-10</sup>

Therefore, for obstetricians, it is crucial to identify the potential protective and risk factors influencing a woman's successful VBAC based on the patients' baseline characteristics. Several studies have reported that patient demographic characteristics (patient race and ethnicity, education level and gestational week),<sup>11 12</sup> maternal factors (maternal age, body mass index, bishop score, diabetes, hypertensive disorders complicating pregnancy and previous vaginal deliver)<sup>12-15</sup>, fetal factors (estimated birth weight)<sup>16</sup> and other related factors (oxytocin implementation)<sup>15</sup> that may be associated with a woman's chance for successful VBAC. Some predictive models for successful VBAC have also been published in recent years.<sup>13 17 18</sup> However, the

1  
2  
3  
4 quality of these models varied considerably in terms of study design, enrolled patients,  
5  
6 internal and external validity of the models, which make the models' applicability  
7  
8 domain rather dubious.  
9  
10

11  
12  
13  
14 This study aims to use a novel approach to identify a set of potential predictive factors  
15  
16 for successful VBAC, especially for Chinese women, to be included in future  
17  
18 prediction models which can be most applicable to pregnant women in China. We  
19  
20 plan to assess all potential predictive factors collected through a comprehensive  
21  
22 literature review. Then the certainty of the evidence for the identified potential  
23  
24 predictive factors will be assessed using the Grading of Recommendations  
25  
26 Assessment, Development, and Evaluation (GRADE) process. Finally, a two-round  
27  
28 international Delphi survey will be conducted to determine the level of consensus.  
29  
30  
31  
32  
33  
34  
35  
36  
37

### 38 **Ethics**

39  
40 The study was approved by the Institutional Review Board of the Jiaying Maternity  
41  
42 and Children Health Care Hospital.  
43  
44  
45  
46  
47

### 48 **Study design**

49  
50 We will carry out a study that combines a comprehensive systematic review and an  
51  
52 evaluation of the certainty of the evidence based on GRADE approach.<sup>19</sup> As  
53  
54 demonstrated in the flowchart (**Figure 1**), a structured Delphi survey-based expert  
55  
56  
57  
58  
59  
60

1  
2  
3  
4 judgment will be made to include or exclude potential predictive factors for successful  
5  
6 VBAC.  
7  
8  
9

## 11 **Systematic literature review**

12  
13  
14 The systematic review will be performed based on the Preferred Reporting Items for  
15  
16 Systematic Reviews and Meta-analyses (PRISMA) guidelines,<sup>20</sup> and aims to update  
17  
18 all potential predictive factors for successful VBAC among women with a previous  
19  
20 CD history, the search strategy of which is described in detail in Table 1. In summary,  
21  
22 we will search Pubmed, EMBASE, Cochrane Library and SinoMed from inception to  
23  
24 November, 2020. Predictive factors and prediction model studies will be selected that  
25  
26 report potential predictive factors for successful VBAC among women with a  
27  
28 previous history of CD. We define successful VBAC as a successful vaginal delivery  
29  
30 after a previous cesarean section. Two independent reviewers will screen the articles  
31  
32 for eligibility and extract the data after duplicated citations are removed.  
33  
34  
35  
36  
37  
38  
39  
40  
41  
42

43 For a given potential predictive factor, we will pool the summary relative risks (RRs)  
44  
45 or odds ratios (ORs) with 95% CIs for predictive factors reported  $\geq 2$  studies using  
46  
47 random-effects models.<sup>21</sup> Cochran Q and the  $I^2$  statistics will be applied to investigate  
48  
49 sources of heterogeneity, with an  $I^2$  statistic  $>50\%$  referring to substantial  
50  
51 heterogeneity.<sup>22</sup> Publication bias will be tested using Egger's test, with a P value  $< 0.1$   
52  
53 indicating significant difference.<sup>23</sup> Then the GRADE approach will be applied to  
54  
55 assess and rate the certainty of the evidence independently.<sup>19</sup> The results of the  
56  
57  
58  
59  
60

1  
2  
3  
4 systematic review will provide the basis to develop a framework for voting in the  
5  
6 two-round international Delphi survey.  
7  
8  
9

10  
11 When the systematic review is finished, we will hold a face-to-face meeting among  
12  
13 the research team to discuss the main findings of the systematic review. Through the  
14  
15 discussion, we will judge which potential predictive factors should be included in the  
16  
17 Delphi process. The results will be presented with forest plots for each meta-analysis  
18  
19 combined with the effect estimates and their confidence intervals. We will also  
20  
21 evaluate the evidence of the observational studies which will be graded into  
22  
23 high-quality, moderate-quality and low-quality evidence according to Egger's P value,  
24  
25 total sample size and between-study heterogeneity as recommended by Mei et al.<sup>24</sup>  
26  
27 After grading the evidence, the research team members will discuss the feasibility and  
28  
29 acceptability of the potential predictive factors included in the Delphi survey, which  
30  
31 will be categorised into 3 groups: included, potentially included, and excluded  
32  
33 predictive factors, the method of which was recommended by Darzi, et al.<sup>25</sup> The  
34  
35 included potential predictive factors are defined as those that should be included in  
36  
37 the future prediction model. The potentially included predictive factors are defined as  
38  
39 candidates that will potentially be included in the future prediction model. The  
40  
41 excluded predictive factors are those that will not be considered to be included in the  
42  
43 prediction model.  
44  
45  
46  
47  
48  
49  
50  
51  
52  
53  
54  
55  
56  
57

### 58 **Expert panel participants**

59  
60

1  
2  
3  
4 The expert panel will be selected from all over the world including obstetricians and  
5  
6 senior researchers with expertise in management of obstetric or perinatal  
7  
8 complications for pregnant women with a previous history of CD, and in the  
9  
10 development, validation, and application of predictive models for clinical practice.  
11  
12

13  
14 Panel experts will participate in a web-based panel conference, complete surveys and  
15  
16 questionnaires, if necessary, will also provide feedback on reports. They will disclose  
17  
18 that they do not have any conflicts of interest and then complete the  
19  
20 declaration-of-interest forms to avoid any potentially existing conflicts regarding the  
21  
22 existing predictive models and other factors.  
23  
24  
25  
26  
27  
28  
29

30 We will select members of the expert panel by using the following predesigned  
31  
32 criteria:  
33

- 34  
35 1) First or corresponding authors of a journal article on potential predictive factors  
36  
37 for successful VBAC in hospitalised obstetric patients.  
38  
39
- 40  
41 2) Representative members from International Federation of Gynaecologists and  
42  
43 Obstetricians (FIGO), the American College of Obstetricians and Gynecologists  
44  
45 (ACOG), the Royal College of Obstetricians and Gynaecologists (RCOG), and  
46  
47 Chinese Obstetricians and Gynecologists Association (COGA).  
48  
49
- 50  
51 3) Guideline authors of the above mentioned associations of obstetricians and  
52  
53 gynecologists.  
54  
55

56 The research team is composed of one senior obstetrician, 2 to 3 resident physicians  
57  
58 working in gynecology and obstetrics, a senior researcher, who will work together to  
59  
60

1  
2  
3  
4 compile the evidence for presentation, draft the questionnaire for the two-round  
5  
6 Delphi survey, analyse the responses, and summarise the results.  
7  
8  
9

### 10 11 **Two-round Delphi survey** 12

13  
14 The expert panel will answer questions on three categories of the potential predictive  
15  
16 factors for successful VBAC: patient-related, maternal-related and fetal-related  
17  
18 predictive factors. The results of the systematic review will be presented to the experts  
19  
20 and they will be asked to rate their agreement with these three aspects of potential  
21  
22 predictive factor proposals. For example, they will rate their agreements with the  
23  
24 following statements: (1) that maternal age is a predictive factor of limited / critical  
25  
26 importance to successful VBAC; (2) that level of education is a predictive factor of  
27  
28 limited / critical importance to successful VBAC; or (3) that estimated fetal weight is  
29  
30 a predictive factor of limited / critical importance to successful VBAC.  
31  
32  
33  
34  
35  
36  
37  
38  
39

40 A list of potential predictive factors will be delivered to the expert panel by e-mail in  
41  
42 the form of google form questionnaire, which we summarise based on the results of  
43  
44 the systematic review and identify them finally by group discussion among the  
45  
46 research team members. Each member of expert panel will provide his or her  
47  
48 response independently. Discussions are not allowed among expert panel  
49  
50 members. During the first-round survey, the initial list of potential predictive factors  
51  
52 yielded by the systematic review will be supplemented with other relevant factors  
53  
54 which might be suggested by the expert panel members. These will constitute all the  
55  
56  
57  
58  
59  
60

1  
2  
3  
4 item list of the first-round Delphi survey. We initially classify the potential predictive  
5  
6 factors into three categories according to the literature reports and general knowledge,  
7  
8 including patient-related factors (race/ethnicity, level of education, delivery interval  
9  
10 and gestational week), maternal-related factors (maternal age, body mass index,  
11  
12 previous vaginal delivery history and trial of labor after a CD history) and  
13  
14 fetal-related factors (estimated fetal weight).  
15  
16  
17  
18  
19  
20  
21

22 The second-round Delphi survey will be designed for the experts to make final  
23  
24 clinical or methodological judgements regarding the potential predictive factors for  
25  
26 successful VBAC based on the reports of the first-round survey.  
27  
28  
29  
30  
31

32 The expert panel members will be asked to rate the importance of each candidate item  
33  
34 using a 9-point Likert scale, where 1 to 3 means “low importance”, 4 to 6 means “not  
35  
36 critically important” and 7 to 9 means “critical importance”.<sup>26-29</sup>  
37  
38  
39

40 An “unable to rate” option will also be set. The expert panel members will be  
41  
42 instructed to choose “unable to rate” if they think they do not have adequate  
43  
44 knowledge or expertise on a particular list of statement.<sup>30 31</sup> During the first round,  
45  
46 panel members can suggest some more related items to be incorporated into the  
47  
48 second round of survey after discussion by the research team. Only panel members  
49  
50 who have finished the first-round survey can move to the second-round survey.  
51  
52  
53 During the second round, they will be reminded of what they rated during the first  
54  
55 round and will be shown the distribution of responses across the 1 to 9 scale for  
56  
57  
58  
59  
60

1  
2  
3  
4 each question in the questionnaire. The expert panel members have the right to retain  
5  
6 their first-round scores or rescored for some specific statements. Both rounds of  
7  
8 online voting are anonymous to minimise bias.  
9  
10

### 11 12 13 14 **Consensus definition and analysis plan**

15  
16 We will consider consensus to be reached and the potential predictive factors will be  
17  
18 included if more than 70% of panel members score the statement within 7 to 9  
19  
20 (critical importance) or less than 15% of panel members score the statement within 1  
21  
22 to 3 (low importance); or in contrast, the potential predictive factors will be excluded  
23  
24 if more than 70% of panel members score the statement within 1 to 3 (low importance)  
25  
26 or less than 15% of panel members score the statement within 7 to 9 (critical  
27  
28 importance).<sup>32</sup>  
29  
30  
31  
32  
33  
34  
35  
36  
37

38 This framework is recommended by the GRADE (Grading of Recommendations  
39  
40 Assessment, Development, and Evaluation) group used to assess the importance of  
41  
42 evidence. At the end of the questionnaire, we will encourage experts who participate  
43  
44 in the survey to add some other potential predictive factors that they think are relevant,  
45  
46 and it is better to provide some reasons.  
47  
48  
49  
50  
51  
52

53 Finally, the panel members' agreement on the factors' importance will be assessed  
54  
55 using the Disagreement Index (DI), as described in the RAND/UCLA approach.<sup>33</sup> The  
56  
57 DI generally reflects the distribution and symmetry of the scores (ranging from 1 to 9),  
58  
59  
60



1  
2  
3  
4 with a higher DI representing wider spread across the 9-point scale, while lower DI  
5  
6 representing increasing consensus. If the DI exceeds 1.0, the distribution is regarded  
7  
8 as extreme variation in rated scores, while the DI is less than 1.0, we consider no  
9  
10 extreme variation existence, which means that a consensus is reached.  
11  
12  
13  
14  
15  
16

### 17 **Patient and public involvement**

18  
19 This protocol will be carried out without patient or public involvement.  
20  
21  
22

### 23 **Discussion**

24  
25 In this work, we will apply a novel evidence-based approach to systematically  
26  
27 identify a set of potential predictive factors for successful VBAC in pregnant women  
28  
29 with a history of CD. We will first conduct an extensive systematic literature review  
30  
31 to identify a number of potentially relevant patient, maternal and fetal-related  
32  
33 predictive factors through systematic review and assess the level of evidence of their  
34  
35 predictive value using the GRADE approach. We will next develop an international  
36  
37 two-round Delphi survey to reach a consensus among international obstetric experts  
38  
39 from 4 international obstetricians and gynecologists associations of the world (FIGO,  
40  
41 ACOG, RCOG and COGA) on the importance of the selected factors. Our ultimate  
42  
43 purpose of this study is to reach evidence-based consensus on the potential predictive  
44  
45 factors of successful VBAC used for future prediction model development. At the  
46  
47 moment, there are no validated prediction models for successful VBAC based on  
48  
49 large prospective cohort studies.  
50  
51  
52  
53  
54  
55  
56  
57  
58  
59  
60

### **Strengths and limitations**

Our study has several strengths due to its rigorous methods that are robust and reproducible for several reasons. First, our systematic review will be conducted based on the PRISMA guidelines.<sup>20</sup> The search strategy is most comprehensive compared with the previously ones.<sup>12 34</sup> Secondly, we will apply the GRADE approach to assess the certainty of evidence, which is a most solid method for decision making in several aspects, including for the development of future clinical guidelines.<sup>19</sup> Thirdly, our research team will provide objective suggestions to identify all potential predictive factors for successful VBAC. Fourthly, the consensus regarding the issue will be based on a two-round Delphi survey among international obstetric experts from multiple international obstetricians and gynecologists associations of the world, making the results more convincing. Moreover, the two-round Delphi survey will be completely anonymous to reduce bias to the greatest extent. These set of methods will guarantee the internal and external validity of the study results.

There are limitations to this study as well. Firstly, the quality of the included studies varied considerably because most of the studies are observational cohort studies, and some are retrospective in study design. Secondly, the statements of Delphi survey to be developed are generally brief in nature. Some unknown domains related to the potential predictive factors may not be involved and addressed adequately. Thirdly, some of the experts involved in the Delphi survey will be clinical researchers instead

1  
2  
3  
4 of obstetricians, and they might lack knowledge regarding certain aspects of factors  
5  
6 for successful VBAC. However, clinical researchers will be trained in advance and  
7  
8 may have a more evidence-based perspective of predictive factors, thus they may be  
9  
10 more aware of the evidence and how factors appear to interact. Fourthly, though  
11  
12 representative participants will be enrolled as expert panel in the Delphi survey  
13  
14 mainly from Europe, USA and China, the experts do not cover the whole global  
15  
16 regions, which may lead to a selection bias, and the results could not be applicable to  
17  
18 regions outside Europe, USA and China.  
19  
20  
21  
22  
23  
24  
25  
26

### **Implications for clinical practice and further research**

27  
28  
29 This study will present a group of agreed predictors that the expert panel can use to  
30  
31 predict successful VBAC more accurately. First of all, the evaluated predictors may  
32  
33 help obstetricians assess the risk of the individual patient. Based on the findings of  
34  
35 this study, further investigations are warranted to provide some more possible  
36  
37 predictors.  
38  
39  
40  
41  
42  
43  
44  
45

46 In a related study to be conducted by our research team, we will involve these  
47  
48 variables that predict successful VBAC found in this consensus study. This will  
49  
50 enable us to make adjustment for these factors in terms of the level of evidence based  
51  
52 on the results of the study, which will improve the prediction accuracy. Further  
53  
54 research should focus on evaluating the importance of these predictors. In addition,  
55  
56 this study could provide the direction of future research on the evaluation of risk  
57  
58  
59  
60

1  
2  
3  
4 factors for successful VBAC, which will ultimately be incorporated in the  
5  
6 development and validation of prediction models of successful VBAC.  
7  
8  
9

## 10 11 **Conclusion**

12  
13  
14 In summary, this study protocol summarises the design of the assessment of potential  
15  
16 predictive factors collected through a comprehensive literature review combined with  
17  
18 a two-round international Delphi survey . The results from this study will be  
19  
20 interpreted for the purpose of clinical decision making for obstetricians to determine  
21  
22 the suitable patients for VBAC, which will be most applicable to pregnant women in  
23  
24  
25  
26  
27 China.  
28  
29  
30  
31  
32  
33  
34  
35  
36  
37  
38  
39  
40  
41  
42  
43  
44  
45  
46  
47  
48  
49  
50  
51  
52  
53  
54  
55  
56  
57  
58  
59  
60

**Contributorship statement:**

Ling Ai and Zubing Mei contributed equally as co-corresponding author.

Dr. Weiyong Zhu had full access to all of the data in the study and takes responsibility for the integrity of the data and the accuracy of the data analysis.

Study concept and design: Weiyong Zhu and Zubing Mei.

Acquisition, analysis, or interpretation of data: Weiyong Zhu, Ling Ai, Ying Feng, Haiyan Yuan, Yu Wang, and Meitang Wang.

Drafting of the manuscript: Weiyong Zhu, Zubing Mei.

Critical revision of the manuscript for important intellectual content: All authors.

Statistical analysis: Zubing Mei, Ling Ai

Administrative, technical, or material support: All authors.

Study supervision: Zubing Mei.

**Competing interests:**

The authors declare that they have no conflict of interest.

**Funding:**

This work was supported by Minsheng Special Project of Scientific and Technological Innovation of Jiaxing City (grant no. 2019AD32061), the National Natural Science Foundation of China (grant no. 81774112), a grant from Siming Scholars from Shuguang Hospital (grant no. SGXZ-201913).

## References

1. Denham SH, Humphrey T, deLabrusse C, et al. Mode of birth after caesarean section: individual prediction scores using Scottish population data. *BMC pregnancy and childbirth* 2019;19(1):84.
2. Obstetricians ACo, Gynecologists. ACOG Practice Bulletin No. 205: Vaginal birth after cesarean delivery. *Obstetrics and gynecology* 2019;133(2):e110-e27.
3. Hidalgo-Lopezosa P, Hidalgo-Maestre M. Risk of uterine rupture in vaginal birth after cesarean: Systematic review. *Enfermería Clínica (English Edition)* 2017;27(1):28-39. doi: <https://doi.org/10.1016/j.enfcle.2016.08.002>
4. Obstetricians ACo, Gynecologists. Vaginal birth after cesarean delivery. ACOG Practice Bulletin No. 184. *Obstetrics and Gynecology* 2017;130(5):e217-e33.
5. No RRG-tG. 45: Birth After Previous Caesarean Birth. Royal College of Obstetrician and Gynaecologists 2015
6. Vaginal birth after cesarean: New insights. In National Institutes of Health Consensus Development Conference; 2010.
7. El-Sayed YY, Watkins MM, Fix M, et al. Perinatal outcomes after successful and failed trials of labor after cesarean delivery. *American journal of obstetrics and gynecology* 2007;196(6):583. e1-83. e5.
8. Guise J-M, Denman MA, Emeis C, et al. Vaginal birth after cesarean: new insights on maternal and neonatal outcomes. *Obstetrics & Gynecology* 2010;115(6):1267-78.
9. McMahon MJ, Luther ER, Bowes Jr WA, et al. Comparison of a trial of labor with an elective second cesarean section. *New England journal of medicine* 1996;335(10):689-95.
10. Suarez-Easton S, Zafran N, Garmi G, et al. Postcesarean wound infection: prevalence, impact, prevention, and management challenges. *International journal of women's health* 2017;9:81.
11. Lehmann S, Baghestan E, Børdahl PE, et al. Low risk pregnancies after a cesarean section: Determinants of trial of labor and its failure. *Plos one* 2020;15(1):e0226894.
12. Wu Y, Kataria Y, Wang Z, et al. Factors associated with successful vaginal birth after a cesarean section: a systematic review and meta-analysis. *BMC pregnancy and childbirth* 2019;19(1):1-12.
13. Manzanares S, Ruiz-Duran S, Pinto A, et al. An integrated model with classification criteria to predict vaginal delivery success after cesarean section. *The Journal of Maternal-Fetal & Neonatal Medicine* 2020;33(2):236-42.
14. Minsart A-F, Liu H, Moffett S, et al. Vaginal birth after caesarean delivery in Chinese women and Western immigrants in Shanghai. *Journal of Obstetrics and Gynaecology* 2017;37(4):446-49.
15. Familiari A, Neri C, Caruso A, et al. Vaginal birth after caesarean section: a multicentre study on prognostic factors and feasibility. *Archives of gynecology and obstetrics* 2020;301(2):509-15. doi: 10.1007/s00404-020-05454-0 [published Online First: 2020/02/13]

16. Smithies M, Woolcott CG, Brock J-AK, et al. Factors associated with trial of labour and mode of delivery in Robson Group 5: A select group of women with previous caesarean section. *Journal of Obstetrics and Gynaecology Canada* 2018;40(6):704-11.
17. Baranov A, Salvesen K, Vikhareva O. Validation of prediction model for successful vaginal birth after Cesarean delivery based on sonographic assessment of hysterotomy scar. *Ultrasound in Obstetrics & Gynecology* 2018;51(2):189-93.
18. Mooney SS, Hiscock R, Clarke IDA, et al. Estimating success of vaginal birth after caesarean section in a regional Australian population: Validation of a prediction model. *Australian and New Zealand Journal of Obstetrics and Gynaecology* 2019;59(1):66-70.
19. Balshem H, Helfand M, Schünemann HJ, et al. GRADE guidelines: 3. Rating the quality of evidence. *Journal of clinical epidemiology* 2011;64(4):401-06.
20. Moher D, Liberati A, Tetzlaff J, et al. Preferred reporting items for systematic reviews and meta-analyses: the PRISMA statement. *PLoS medicine* 2009;6(7):e1000097. doi: 10.1371/journal.pmed.1000097 [published Online First: 2009/07/22]
21. DerSimonian R, Laird N. Meta-analysis in clinical trials. *Controlled clinical trials* 1986;7(3):177-88.
22. Higgins JP, Thompson SG, Deeks JJ, et al. Measuring inconsistency in meta-analyses. *Bmj* 2003;327(7414):557-60.
23. Egger M, Smith GD, Schneider M, et al. Bias in meta-analysis detected by a simple, graphical test. *Bmj* 1997;315(7109):629-34.
24. Mei Z, Wang Q, Zhang Y, et al. Risk factors for recurrence after anal fistula surgery: a meta-analysis. *International Journal of Surgery* 2019;69:153-64.
25. Darzi AJ, Karam SG, Spencer FA, et al. Risk models for VTE and bleeding in medical inpatients: systematic identification and expert assessment. *Blood advances* 2020;4(12):2557-66. doi: 10.1182/bloodadvances.2020001937 [published Online First: 2020/06/17]
26. Xu Q, Huang Y, Chen B. Comprehensive assessment of health education and health promotion in five non-communicable disease demonstration districts in China: a cross-sectional study. *BMJ open* 2017;7(12):e015943. doi: 10.1136/bmjopen-2017-015943 [published Online First: 2017/12/29]
27. Mrowietz U, de Jong EM, Kragballe K, et al. A consensus report on appropriate treatment optimization and transitioning in the management of moderate-to-severe plaque psoriasis. *Journal of the European Academy of Dermatology and Venereology : JEADV* 2014;28(4):438-53. doi: 10.1111/jdv.12118 [published Online First: 2013/02/27]
28. Suzuki Y, Fukasawa M, Nakajima S, et al. Development of disaster mental health guidelines through the Delphi process in Japan. *International journal of mental health systems* 2012;6(1):7. doi: 10.1186/1752-4458-6-7 [published Online First: 2012/07/04]

- 1  
2  
3  
4  
5  
6  
7  
8  
9  
10  
11  
12  
13  
14  
15  
16  
17  
18  
19  
20  
21  
22  
23  
24  
25  
26  
27  
28  
29  
30  
31  
32  
33  
34  
35  
36  
37  
38  
39  
40  
41  
42  
43  
44  
45  
46  
47  
48  
49  
50  
51  
52  
53  
54  
55  
56  
57  
58  
59  
60
29. Konstantinou K, Hider SL, Vogel S, et al. Development of an assessment schedule for patients with low back-associated leg pain in primary care: a Delphi consensus study. *European spine journal : official publication of the European Spine Society, the European Spinal Deformity Society, and the European Section of the Cervical Spine Research Society* 2012;21(7):1241-9. doi: 10.1007/s00586-011-2057-2 [published Online First: 2011/11/05]
30. Williamson PR, Altman DG, Blazeby JM, et al. Developing core outcome sets for clinical trials: issues to consider. *Trials* 2012;13:132. doi: 10.1186/1745-6215-13-132 [published Online First: 2012/08/08]
31. Teoh JY, MacLennan S, Chan VW, et al. An International Collaborative Consensus Statement on En Bloc Resection of Bladder Tumour Incorporating Two Systematic Reviews, a Two-round Delphi Survey, and a Consensus Meeting. *European urology* 2020;78(4):546-69. doi: 10.1016/j.eururo.2020.04.059 [published Online First: 2020/05/12]
32. Bilbro NA, Hirst A, Paez A, et al. The IDEAL Reporting Guidelines: A Delphi Consensus Statement Stage specific recommendations for reporting the evaluation of surgical innovation. *Annals of surgery* 2020 doi: 10.1053/j.ajkd.2020.03.014  
10.1097/sla.0000000000004180 [published Online First: 2020/07/14  
2020/07/11]
33. Danese S, Bonovas S, Lopez A, et al. Identification of Endpoints for Development of Antifibrosis Drugs for Treatment of Crohn's Disease. *Gastroenterology* 2018;155(1):76-87. doi: 10.1053/j.gastro.2018.03.032 [published Online First: 2018/03/31]
34. Wingert A, Hartling L, Sebastianski M, et al. Clinical interventions that influence vaginal birth after cesarean delivery rates: Systematic Review & Meta-Analysis. *BMC Pregnancy Childbirth* 2019;19(1):529. doi: 10.1186/s12884-019-2689-5 [published Online First: 2020/01/01]



**Table 1.** Search strategy for Pubmed.

|                                                                                                                                                                                                  |
|--------------------------------------------------------------------------------------------------------------------------------------------------------------------------------------------------|
| 1. "Vaginal Birth after Cesarean"[Mesh]                                                                                                                                                          |
| 2. "Trial of Labor"[Mesh]                                                                                                                                                                        |
| 3. "Cesarean Section, Repeat"[Mesh]                                                                                                                                                              |
| 4. "Cesarean Section"[Mesh]                                                                                                                                                                      |
| 5. 1-4/OR                                                                                                                                                                                        |
| 6. 'Vaginal Birth after Cesarean' OR VBAC OR 'trial of labor' OR 'cesarean section' OR TOLAC OR 'vaginal birth*' OR 'vaginal deliver*' OR 'trial of labour' OR 'active labor' OR 'active labour' |
| 7. 5 OR 6                                                                                                                                                                                        |

**Figure legend****Figure 1.** Flowchart of the study design.

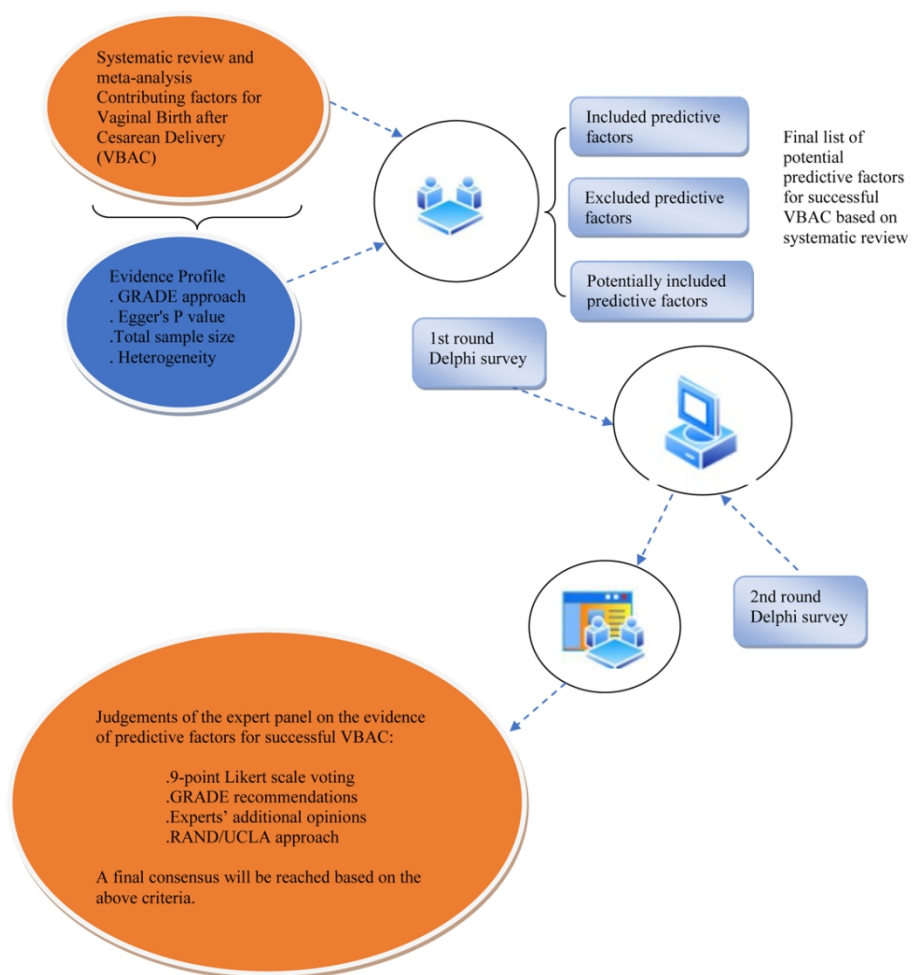

Figure 1. Flowchart of the study design.

# BMJ Open

## Factors predicting successful vaginal birth after caesarean section: protocol for evidence-based consensus recommendations using a Delphi survey

|                                 |                                                                                                                                                                                                                                                                                                                                                                                                                                                                                                                                                                                                                                                                                                                                                                                                                             |
|---------------------------------|-----------------------------------------------------------------------------------------------------------------------------------------------------------------------------------------------------------------------------------------------------------------------------------------------------------------------------------------------------------------------------------------------------------------------------------------------------------------------------------------------------------------------------------------------------------------------------------------------------------------------------------------------------------------------------------------------------------------------------------------------------------------------------------------------------------------------------|
| Journal:                        | <i>BMJ Open</i>                                                                                                                                                                                                                                                                                                                                                                                                                                                                                                                                                                                                                                                                                                                                                                                                             |
| Manuscript ID                   | bmjopen-2020-047433.R2                                                                                                                                                                                                                                                                                                                                                                                                                                                                                                                                                                                                                                                                                                                                                                                                      |
| Article Type:                   | Protocol                                                                                                                                                                                                                                                                                                                                                                                                                                                                                                                                                                                                                                                                                                                                                                                                                    |
| Date Submitted by the Author:   | 31-Mar-2021                                                                                                                                                                                                                                                                                                                                                                                                                                                                                                                                                                                                                                                                                                                                                                                                                 |
| Complete List of Authors:       | Zhu, Weiyang ; Jiaxing University, Obstetric Department of Jiaxing Maternity and Children Health Care Hospital<br>Ai, Ling ; Jiaxing University, Obstetric Department of Jiaxing Maternity and Children Health Care Hospital<br>Feng, Ying ; Jiaxing University, Obstetric Department of Jiaxing Maternity and Children Health Care Hospital<br>Yuan, Haiyan ; Jiaxing University, Obstetric Department of Jiaxing Maternity and Children Health Care Hospital<br>Wang, Yu ; Jiaxing University, Science and Education Division of Jiaxing Maternity and Children Health Care Hospital<br>Wang, Meitang ; Changhai Hospital, Emergency Department<br>Mei, Zubing; Shuguang Hospital, Department of Anorectal Surgery; Shanghai University of Traditional Chinese Medicine, Anorectal Disease Institute of Shuguang Hospital |
| <b>Primary Subject Heading</b>: | Obstetrics and gynaecology                                                                                                                                                                                                                                                                                                                                                                                                                                                                                                                                                                                                                                                                                                                                                                                                  |
| Secondary Subject Heading:      | Evidence based practice                                                                                                                                                                                                                                                                                                                                                                                                                                                                                                                                                                                                                                                                                                                                                                                                     |
| Keywords:                       | OBSTETRICS, PREVENTIVE MEDICINE, Protocols & guidelines < HEALTH SERVICES ADMINISTRATION & MANAGEMENT                                                                                                                                                                                                                                                                                                                                                                                                                                                                                                                                                                                                                                                                                                                       |
|                                 |                                                                                                                                                                                                                                                                                                                                                                                                                                                                                                                                                                                                                                                                                                                                                                                                                             |

SCHOLARONE™  
Manuscripts

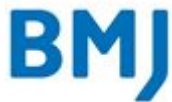

I, the Submitting Author has the right to grant and does grant on behalf of all authors of the Work (as defined in the below author licence), an exclusive licence and/or a non-exclusive licence for contributions from authors who are: i) UK Crown employees; ii) where BMJ has agreed a CC-BY licence shall apply, and/or iii) in accordance with the terms applicable for US Federal Government officers or employees acting as part of their official duties; on a worldwide, perpetual, irrevocable, royalty-free basis to BMJ Publishing Group Ltd ("BMJ") its licensees and where the relevant Journal is co-owned by BMJ to the co-owners of the Journal, to publish the Work in this journal and any other BMJ products and to exploit all rights, as set out in our [licence](#).

The Submitting Author accepts and understands that any supply made under these terms is made by BMJ to the Submitting Author unless you are acting as an employee on behalf of your employer or a postgraduate student of an affiliated institution which is paying any applicable article publishing charge ("APC") for Open Access articles. Where the Submitting Author wishes to make the Work available on an Open Access basis (and intends to pay the relevant APC), the terms of reuse of such Open Access shall be governed by a Creative Commons licence – details of these licences and which [Creative Commons](#) licence will apply to this Work are set out in our licence referred to above.

Other than as permitted in any relevant BMJ Author's Self Archiving Policies, I confirm this Work has not been accepted for publication elsewhere, is not being considered for publication elsewhere and does not duplicate material already published. I confirm all authors consent to publication of this Work and authorise the granting of this licence.

1  
2  
3  
4 **Factors predicting successful vaginal birth after caesarean section: protocol for**  
5 **evidence-based consensus recommendations using a Delphi survey**  
6  
7

8  
9 Weiyong Zhu<sup>1</sup>, Ling Ai<sup>1#</sup>, Ying Feng<sup>1</sup>, Haiyan Yuan<sup>1</sup>, Yu Wang<sup>2</sup>, Meitang Wang<sup>3</sup>,  
10  
11 Zubing Mei<sup>4, 5#</sup>  
12  
13

- 14  
15 1. Obstetric Department of Jiaying Maternity and Children Health Care Hospital,  
16 Jiaying University, Wenzhou Medical University Affiliated Hospital of  
17 Women and Children, Jiaying, 314000, China  
18  
19 2. Science and Education Division of Jiaying Maternity and Children Health  
20 Care Hospital, Jiaying University, Wenzhou Medical University Affiliated  
21 Hospital of Women and Children, Jiaying, 314000, China  
22  
23 3. Emergency Department, Changhai Hospital, Navy Medical University,  
24 Shanghai, 200433, China.  
25  
26 4. Department of Anorectal Surgery, Shuguang Hospital, Shanghai University of  
27 Traditional Chinese Medicine, Shanghai, 201203, China;  
28  
29 5. Anorectal Disease Institute of Shuguang Hospital, Shanghai, 201203, China.  
30  
31  
32  
33

34 **Correspondence to:**

35  
36 Dr. Ling Ai

37  
38  
39 Obstetric Department of Jiaying Maternity and Children Health Care Hospital,  
40  
41 Jiaying University, Wenzhou Medical University Affiliated Hospital of Women and  
42  
43 Children  
44

45  
46 No.2468 East Central Road, South lake district, Jiaying, 314000, China  
47

48  
49 Tel: 086 13736836830  
50

51  
52 E-mail:13736836830@163.com  
53  
54

55  
56 Dr. Zubing Mei, MD, PhD  
57  
58  
59  
60

1  
2  
3  
4 Department of Anorectal Surgery, Shuguang Hospital, Shanghai University of  
5 Traditional Chinese Medicine; Anorectal Disease Institute of Shuguang Hospital  
6  
7 528 Zhangheng Road, Shanghai 201203, China  
8

9  
10 Tel: 086-2120256187

11  
12 E-mail: herrmayor@126.com or herrmayor@shutcm.edu.cn  
13  
14  
15  
16  
17  
18

19 **Running head:** Delphi survey of factors predicting successful VBAC  
20  
21  
22

23  
24 **Count**

25  
26 **Abstract Word Count:** 297  
27

28  
29 **Word Count (excluding abstract):** 2566  
30

31  
32 **References:** 34  
33

34  
35 **Figure:** 1  
36

37  
38 **Table:** 1  
39  
40  
41

42 **Key words:**  
43

44  
45 vaginal birth after caesarean section (VBAC), predictive factors, systematic review,  
46

47  
48 Delphi survey, evidence-based consensus  
49  
50  
51  
52  
53  
54  
55  
56  
57  
58  
59  
60

## **Abstract**

### **Introduction**

With the wide adoption of the two-child policy in China since 2016, a large percentage of women with a history of caesarean delivery (CD) plan to have a second child. Accordingly, the rate of vaginal birth after caesarean delivery (VBAC) is increasing. Women attempting repeat VBAC may experience multiple morbidities, which is also one of the leading causes of maternal and perinatal mortality. However, it remains to be addressed how we evaluate factors for successful VBAC. This study aims to use a novel approach to identify a set of potential predictive factors for successful VBAC, especially for Chinese women, to be included in prediction models which can be most applicable to pregnant women in China. We plan to assess all potential predictive factors collected through a comprehensive literature review. Then the certainty of the evidence for the identified potential predictive factors will be assessed using the Grading of Recommendations Assessment, Development, and Evaluation (GRADE) process. Finally, a two-round international Delphi survey will be conducted to determine the level of consensus.

### **Methods and analysis**

This study will apply a methodology through an evidence-based approach. A long list of potential predictive factors for successful VBAC will be extracted and identified through the following stages: First, an up-to-date systematic review of the published literature will be conducted to extract identified potential predictive factors for

1  
2  
3  
4 successful VBAC. Second, an online Delphi survey will be performed to achieve  
5  
6 expert consensus on which factors should be included in future prediction models.  
7  
8  
9 The online questionnaires will be developed in the field of patient, maternal and  
10  
11 fetal-related factors. A two-round international Delphi survey will be distributed to  
12  
13 the expert panel in the field of perinatal medicine using Google Forms. Experts will  
14  
15 be asked to score each factor using the 9-point Likert rating scale to establish potential  
16  
17 predictive factors for the successful VBAC. The expert panel will determine on  
18  
19 whether to include, potentially include, or exclude predictive factors, based on a  
20  
21 systematic review of clinical evidence and the Delphi method.  
22  
23  
24  
25

### 26 27 **Ethics and dissemination**

28  
29 The study was approved by the Institutional Review Board of the Jiaying Maternity  
30  
31 and Children Health Care Hospital (approval number: 2019-79). The results of this  
32  
33 study will be submitted to international peer-reviewed journals or conferences in  
34  
35 perinatal medicine or obstetrics.  
36  
37  
38  
39  
40  
41  
42

### 43 **Trial registration number**

44  
45 Open Science Framework (OSF): DOI 10.17605/OSF.IO/8D6XY.  
46  
47  
48  
49

### 50 **Key words**

51  
52 Vaginal birth after caesarean section (VBAC), predictive factors, systematic review,  
53  
54 Delphi survey, evidence-based consensus  
55  
56  
57  
58  
59  
60



### Strengths and limitations of this study

- This study aims to use a mixed methods approach to select potential predictive factors for successful vaginal birth after caesarean section (VBAC) for obstetric patients.
- Potential predictive factors for successful VBAC will be identified through a combination of a systematic literature review and a modified Delphi process.
- The consensus on the potential predictive factors for successful VBAC will be achieved based on a two-round Delphi survey among international experts in the field of obstetrics.
- The expert panel will determine whether to include, potentially include, or exclude the candidate predictive factors, based on the GRADE approach and the Delphi method.

## **Introduction**

The overall cesarean delivery (CD) rates have accelerated significantly globally in recent years.<sup>1</sup> Though successful vaginal birth after cesarean delivery (VBAC) has been reported to reduce morbidity or complications compared to an elective repeat CD,<sup>2</sup> recent evidence has continued to highlight the risks of VBAC.<sup>3</sup> In China, with the wide adoption of the two-child policy since 2016, a large percentage of women with a history of CD plan to have a second child and an elective repeat CD can be a suitable choice. However, a trial of labor after one cesarean (TOLAC) is encouraged in some countries which has been reported to reduce maternal adverse outcomes.<sup>4-6</sup> Studies have also shown that CD after an unsuccessful TOLAC may lead to increased bleeding, postoperative infection, endometritis and increased health care expenditure.<sup>7-10</sup>

Therefore, for obstetricians, it is crucial to identify the potential protective and risk factors influencing a woman's successful VBAC based on the patients' baseline characteristics. Several studies have reported that patient demographic characteristics (patient race and ethnicity, education level and gestational week),<sup>11 12</sup> maternal factors (maternal age, body mass index, bishop score, diabetes, hypertensive disorders complicating pregnancy and previous vaginal deliver)<sup>12-15</sup>, fetal factors (estimated birth weight)<sup>16</sup> and other related factors (oxytocin implementation)<sup>15</sup> that may be associated with a woman's chance for successful VBAC. Some predictive models for successful VBAC have also been published in recent years.<sup>13 17 18</sup> However, the

1  
2  
3  
4 quality of these models varied considerably in terms of study design, enrolled patients,  
5  
6 internal and external validity of the models, which make the models' applicability  
7  
8 domain rather dubious.  
9  
10

11  
12  
13  
14 This study aims to use a novel approach to identify a set of potential predictive factors  
15  
16 for successful VBAC, especially for Chinese women, to be included in future  
17  
18 prediction models which can be most applicable to pregnant women in China. We  
19  
20 plan to assess all potential predictive factors collected through a comprehensive  
21  
22 literature review. Then the certainty of the evidence for the identified potential  
23  
24 predictive factors will be assessed using the Grading of Recommendations  
25  
26 Assessment, Development, and Evaluation (GRADE) process. Finally, a two-round  
27  
28 international Delphi survey will be conducted to determine the level of consensus.  
29  
30  
31  
32  
33  
34  
35  
36  
37

### 38 **Ethics**

39  
40 The study was approved by the Institutional Review Board of the Jiaying Maternity  
41  
42 and Children Health Care Hospital.  
43  
44  
45  
46  
47

### 48 **Study design**

49  
50 We will carry out a study that combines a comprehensive systematic review and an  
51  
52 evaluation of the certainty of the evidence based on GRADE approach.<sup>19</sup> As  
53  
54 demonstrated in the flowchart (**Figure 1**), a structured Delphi survey-based expert  
55  
56  
57  
58  
59  
60

1  
2  
3  
4 judgment will be made to include or exclude potential predictive factors for successful  
5  
6 VBAC.  
7  
8  
9

## 11 **Systematic literature review**

12  
13  
14 The systematic review will be performed based on the Preferred Reporting Items for  
15  
16 Systematic Reviews and Meta-analyses (PRISMA) guidelines,<sup>20</sup> and aims to update  
17  
18 all potential predictive factors for successful VBAC among women with a previous  
19  
20 CD history, the search strategy of which is described in detail in Table 1. In summary,  
21  
22 we will search Pubmed, EMBASE, Cochrane Library and SinoMed from inception to  
23  
24 November, 2020. Predictive factors and prediction model studies will be selected that  
25  
26 report potential predictive factors for successful VBAC among women with a  
27  
28 previous history of CD. We define successful VBAC as a successful vaginal delivery  
29  
30 after a previous cesarean section. Two independent reviewers will screen the articles  
31  
32 for eligibility and extract the data after duplicated citations are removed.  
33  
34  
35  
36  
37  
38  
39  
40  
41  
42

43 For a given potential predictive factor, we will pool the summary relative risks (RRs)  
44  
45 or odds ratios (ORs) with 95% CIs for predictive factors reported  $\geq 2$  studies using  
46  
47 random-effects models.<sup>21</sup> Cochran Q and the  $I^2$  statistics will be applied to investigate  
48  
49 sources of heterogeneity, with an  $I^2$  statistic  $>50\%$  referring to substantial  
50  
51 heterogeneity.<sup>22</sup> Publication bias will be tested using Egger's test, with a P value  $< 0.1$   
52  
53 indicating significant difference.<sup>23</sup> Then the GRADE approach will be applied to  
54  
55 assess and rate the certainty of the evidence independently.<sup>19</sup> The results of the  
56  
57  
58  
59  
60

1  
2  
3  
4 systematic review will provide the basis to develop a framework for voting in the  
5  
6 two-round international Delphi survey.  
7  
8  
9

10  
11 When the systematic review is finished, we will hold a face-to-face meeting among  
12  
13 the research team to discuss the main findings of the systematic review. Through the  
14  
15 discussion, we will judge which potential predictive factors should be included in the  
16  
17 Delphi process. The results will be presented with forest plots for each meta-analysis  
18  
19 combined with the effect estimates and their confidence intervals. We will also  
20  
21 evaluate the evidence of the observational studies which will be graded into  
22  
23 high-quality, moderate-quality and low-quality evidence according to Egger's P value,  
24  
25 total sample size and between-study heterogeneity as recommended by Mei et al.<sup>24</sup>  
26  
27 After grading the evidence, the research team members will discuss the feasibility and  
28  
29 acceptability of the potential predictive factors included in the Delphi survey, which  
30  
31 will be categorised into 3 groups: included, potentially included, and excluded  
32  
33 predictive factors, the method of which was recommended by Darzi, et al.<sup>25</sup> The  
34  
35 included potential predictive factors are defined as those that should be included in  
36  
37 the future prediction model. The potentially included predictive factors are defined as  
38  
39 candidates that will potentially be included in the future prediction model. The  
40  
41 excluded predictive factors are those that will not be considered to be included in the  
42  
43 prediction model.  
44  
45  
46  
47  
48  
49  
50  
51  
52  
53  
54  
55  
56  
57

### 58 **Expert panel participants**

59  
60

1  
2  
3  
4 The expert panel will be selected from all over the world including obstetricians and  
5  
6 senior researchers with expertise in management of obstetric or perinatal  
7  
8 complications for pregnant women with a previous history of CD, and in the  
9  
10 development, validation, and application of predictive models for clinical practice.  
11  
12

13  
14 Panel experts will participate in a web-based panel conference, complete surveys and  
15  
16 questionnaires, if necessary, will also provide feedback on reports. They will disclose  
17  
18 that they do not have any conflicts of interest and then complete the  
19  
20 declaration-of-interest forms to avoid any potentially existing conflicts regarding the  
21  
22 existing predictive models and other factors.  
23  
24  
25  
26  
27  
28  
29

30 We will select members of the expert panel by using the following predesigned  
31  
32 criteria:  
33

- 34  
35 1) First or corresponding authors of a journal article on potential predictive factors  
36  
37 for successful VBAC in hospitalised obstetric patients.  
38  
39
- 40  
41 2) Representative members from International Federation of Gynaecologists and  
42  
43 Obstetricians (FIGO), the American College of Obstetricians and Gynecologists  
44  
45 (ACOG), the Royal College of Obstetricians and Gynaecologists (RCOG), and  
46  
47 Chinese Obstetricians and Gynecologists Association (COGA).  
48  
49
- 50  
51 3) Guideline authors of the above mentioned associations of obstetricians and  
52  
53 gynecologists.  
54  
55

56  
57 The research team is composed of one senior obstetrician, 2 to 3 resident physicians  
58  
59 working in gynecology and obstetrics, a senior researcher, who will work together to  
60

1  
2  
3  
4 compile the evidence for presentation, draft the questionnaire for the two-round  
5  
6 Delphi survey, analyse the responses, and summarise the results.  
7  
8  
9

### 10 11 **Two-round Delphi survey** 12

13  
14 The expert panel will answer questions on three categories of the potential predictive  
15  
16 factors for successful VBAC: patient-related, maternal-related and fetal-related  
17  
18 predictive factors. The results of the systematic review will be presented to the experts  
19  
20 and they will be asked to rate their agreement with these three aspects of potential  
21  
22 predictive factor proposals. For example, they will rate their agreements with the  
23  
24 following statements: (1) that maternal age is a predictive factor of limited / critical  
25  
26 importance to successful VBAC; (2) that level of education is a predictive factor of  
27  
28 limited / critical importance to successful VBAC; or (3) that estimated fetal weight is  
29  
30 a predictive factor of limited / critical importance to successful VBAC.  
31  
32  
33  
34  
35  
36  
37  
38  
39

40 A list of potential predictive factors will be delivered to the expert panel by e-mail in  
41  
42 the form of google form questionnaire, which we summarise based on the results of  
43  
44 the systematic review and identify them finally by group discussion among the  
45  
46 research team members. Each member of expert panel will provide his or her  
47  
48 response independently. Discussions are not allowed among expert panel  
49  
50 members. During the first-round survey, the initial list of potential predictive factors  
51  
52 yielded by the systematic review will be supplemented with other relevant factors  
53  
54 which might be suggested by the expert panel members. These will constitute all the  
55  
56  
57  
58  
59  
60

1  
2  
3  
4 item list of the first-round Delphi survey. We initially classify the potential predictive  
5  
6 factors into three categories according to the literature reports and general knowledge,  
7  
8 including patient-related factors (race/ethnicity, level of education, delivery interval  
9  
10 and gestational week), maternal-related factors (maternal age, body mass index,  
11  
12 previous vaginal delivery history and trial of labor after a CD history) and  
13  
14 fetal-related factors (estimated fetal weight).  
15  
16  
17  
18  
19  
20  
21

22 The second-round Delphi survey will be designed for the experts to make final  
23  
24 clinical or methodological judgements regarding the potential predictive factors for  
25  
26 successful VBAC based on the reports of the first-round survey.  
27  
28  
29  
30  
31

32 The expert panel members will be asked to rate the importance of each candidate item  
33  
34 using a 9-point Likert scale, where 1 to 3 means “low importance”, 4 to 6 means “not  
35  
36 critically important” and 7 to 9 means “critical importance”.<sup>26-29</sup>  
37  
38  
39

40 An “unable to rate” option will also be set. The expert panel members will be  
41  
42 instructed to choose “unable to rate” if they think they do not have adequate  
43  
44 knowledge or expertise on a particular list of statement.<sup>30 31</sup> During the first round,  
45  
46 panel members can suggest some more related items to be incorporated into the  
47  
48 second round of survey after discussion by the research team. Only panel members  
49  
50 who have finished the first-round survey can move to the second-round survey.  
51  
52  
53 During the second round, they will be reminded of what they rated during the first  
54  
55 round and will be shown the distribution of responses across the 1 to 9 scale for  
56  
57  
58  
59  
60



1  
2  
3  
4 each question in the questionnaire. The expert panel members have the right to retain  
5  
6 their first-round scores or rescored for some specific statements. Both rounds of  
7  
8 online voting are anonymous to minimise bias.  
9  
10

### 11 12 13 14 **Consensus definition and analysis plan**

15  
16 We will consider consensus to be reached and the potential predictive factors will be  
17  
18 included if more than 70% of panel members score the statement within 7 to 9  
19  
20 (critical importance) or less than 15% of panel members score the statement within 1  
21  
22 to 3 (low importance); or in contrast, the potential predictive factors will be excluded  
23  
24 if more than 70% of panel members score the statement within 1 to 3 (low importance)  
25  
26 or less than 15% of panel members score the statement within 7 to 9 (critical  
27  
28 importance).<sup>32</sup>  
29  
30  
31  
32  
33  
34  
35  
36  
37

38 This framework is recommended by the GRADE (Grading of Recommendations  
39  
40 Assessment, Development, and Evaluation) group used to assess the importance of  
41  
42 evidence. At the end of the questionnaire, we will encourage experts who participate  
43  
44 in the survey to add some other potential predictive factors that they think are relevant,  
45  
46 and it is better to provide some reasons.  
47  
48  
49  
50  
51  
52

53 Finally, the panel members' agreement on the factors' importance will be assessed  
54  
55 using the Disagreement Index (DI), as described in the RAND/UCLA approach.<sup>33</sup> The  
56  
57 DI generally reflects the distribution and symmetry of the scores (ranging from 1 to 9),  
58  
59  
60

1  
2  
3  
4 with a higher DI representing wider spread across the 9-point scale, while lower DI  
5  
6 representing increasing consensus. If the DI exceeds 1.0, the distribution is regarded  
7  
8 as extreme variation in rated scores, while the DI is less than 1.0, we consider no  
9  
10 extreme variation existence, which means that a consensus is reached.  
11  
12  
13  
14  
15  
16

### 17 **Patient and public involvement**

18  
19 This protocol will be carried out without patient or public involvement.  
20  
21  
22

### 23 **Discussion**

24  
25 In this work, we will apply a novel evidence-based approach to systematically  
26  
27 identify a set of potential predictive factors for successful VBAC in pregnant women  
28  
29 with a history of CD. We will first conduct an extensive systematic literature review  
30  
31 to identify a number of potentially relevant patient, maternal and fetal-related  
32  
33 predictive factors through systematic review and assess the level of evidence of their  
34  
35 predictive value using the GRADE approach. We will next develop an international  
36  
37 two-round Delphi survey to reach a consensus among international obstetric experts  
38  
39 from 4 international obstetricians and gynecologists associations of the world (FIGO,  
40  
41 ACOG, RCOG and COGA) on the importance of the selected factors. Our ultimate  
42  
43 purpose of this study is to reach evidence-based consensus on the potential predictive  
44  
45 factors of successful VBAC used for future prediction model development. At the  
46  
47 moment, there are no validated prediction models for successful VBAC based on  
48  
49 large prospective cohort studies.  
50  
51  
52  
53  
54  
55  
56  
57  
58  
59  
60

### **Strengths and limitations**

Our study has several strengths due to its rigorous methods that are robust and reproducible for several reasons. First, our systematic review will be conducted based on the PRISMA guidelines.<sup>20</sup> The search strategy is most comprehensive compared with the previously ones.<sup>12 34</sup> Secondly, we will apply the GRADE approach to assess the certainty of evidence, which is a most solid method for decision making in several aspects, including for the development of future clinical guidelines.<sup>19</sup> Thirdly, our research team will provide objective suggestions to identify all potential predictive factors for successful VBAC. Fourthly, the consensus regarding the issue will be based on a two-round Delphi survey among international obstetric experts from multiple international obstetricians and gynecologists associations of the world, making the results more convincing. Moreover, the two-round Delphi survey will be completely anonymous to reduce bias to the greatest extent. These set of methods will guarantee the internal and external validity of the study results.

There are limitations to this study as well. Firstly, the quality of the included studies varied considerably because most of the studies are observational cohort studies, and some are retrospective in study design. Secondly, the statements of Delphi survey to be developed are generally brief in nature. Some unknown domains related to the potential predictive factors may not be involved and addressed adequately. Thirdly, some of the experts involved in the Delphi survey will be clinical researchers instead

1  
2  
3  
4 of obstetricians, and they might lack knowledge regarding certain aspects of factors  
5  
6 for successful VBAC. However, clinical researchers will be trained in advance and  
7  
8 may have a more evidence-based perspective of predictive factors, thus they may be  
9  
10 more aware of the evidence and how factors appear to interact. Fourthly, though  
11  
12 representative participants will be enrolled as expert panel in the Delphi survey  
13  
14 mainly from Europe, USA and China, the experts do not cover the whole global  
15  
16 regions, which may lead to a selection bias, and the results could not be applicable to  
17  
18 regions outside Europe, USA and China.  
19  
20  
21  
22  
23  
24  
25  
26

### **Implications for clinical practice and further research**

27  
28  
29 This study will present a group of agreed predictors that the expert panel can use to  
30  
31 predict successful VBAC more accurately. First of all, the evaluated predictors may  
32  
33 help obstetricians assess the risk of the individual patient. Based on the findings of  
34  
35 this study, further investigations are warranted to provide some more possible  
36  
37 predictors.  
38  
39  
40  
41  
42  
43  
44

45 In a related study to be conducted by our research team, we will involve these  
46  
47 variables that predict successful VBAC found in this consensus study. This will  
48  
49 enable us to make adjustment for these factors in terms of the level of evidence based  
50  
51 on the results of the study, which will improve the prediction accuracy. Further  
52  
53 research should focus on evaluating the importance of these predictors. In addition,  
54  
55 this study could provide the direction of future research on the evaluation of risk  
56  
57  
58  
59  
60

1  
2  
3  
4 factors for successful VBAC, which will ultimately be incorporated in the  
5  
6 development and validation of prediction models of successful VBAC.  
7  
8  
9

10  
11 Therefore, this study protocol summarises the design of the assessment of potential  
12  
13 predictive factors collected through a comprehensive literature review combined with  
14  
15 a two-round international Delphi survey . The results from this study will be  
16  
17 interpreted for the purpose of clinical decision making for obstetricians to determine  
18  
19 the suitable patients for VBAC, which will be most applicable to pregnant women in  
20  
21  
22  
23  
24  
25 China.  
26  
27  
28  
29  
30  
31  
32  
33  
34  
35  
36  
37  
38  
39  
40  
41  
42  
43  
44  
45  
46  
47  
48  
49  
50  
51  
52  
53  
54  
55  
56  
57  
58  
59  
60

**Contributorship statement:**

Ling Ai and Zubing Mei contributed equally as co-corresponding author.

Dr. Weiyong Zhu had full access to all of the data in the study and takes responsibility for the integrity of the data and the accuracy of the data analysis.

Study concept and design: Weiyong Zhu and Zubing Mei.

Acquisition, analysis, or interpretation of data: Weiyong Zhu, Ling Ai, Ying Feng, Haiyan Yuan, Yu Wang, and Meitang Wang.

Drafting of the manuscript: Weiyong Zhu, Zubing Mei.

Critical revision of the manuscript for important intellectual content: All authors.

Statistical analysis: Zubing Mei, Ling Ai

Administrative, technical, or material support: All authors.

Study supervision: Zubing Mei.

**Competing interests:**

The authors declare that they have no conflict of interest.

**Funding:**

This work was supported by Minsheng Special Project of Scientific and Technological Innovation of Jiaxing City (grant no. 2019AD32061), the National Natural Science Foundation of China (grant no. 81774112), a grant from Siming Scholars from Shuguang Hospital (grant no. SGXZ-201913).

## References

1. Denham SH, Humphrey T, deLabrusse C, et al. Mode of birth after caesarean section: individual prediction scores using Scottish population data. *BMC pregnancy and childbirth* 2019;19(1):84.
2. Obstetricians ACo, Gynecologists. ACOG Practice Bulletin No. 205: Vaginal birth after cesarean delivery. *Obstetrics and gynecology* 2019;133(2):e110-e27.
3. Hidalgo-Lopezosa P, Hidalgo-Maestre M. Risk of uterine rupture in vaginal birth after cesarean: Systematic review. *Enfermería Clínica (English Edition)* 2017;27(1):28-39. doi: <https://doi.org/10.1016/j.enfcle.2016.08.002>
4. Obstetricians ACo, Gynecologists. Vaginal birth after cesarean delivery. ACOG Practice Bulletin No. 184. *Obstetrics and Gynecology* 2017;130(5):e217-e33.
5. No RRG-tG. 45: Birth After Previous Caesarean Birth. Royal College of Obstetrician and Gynaecologists 2015
6. Vaginal birth after cesarean: New insights. In National Institutes of Health Consensus Development Conference; 2010.
7. El-Sayed YY, Watkins MM, Fix M, et al. Perinatal outcomes after successful and failed trials of labor after cesarean delivery. *American journal of obstetrics and gynecology* 2007;196(6):583. e1-83. e5.
8. Guise J-M, Denman MA, Emeis C, et al. Vaginal birth after cesarean: new insights on maternal and neonatal outcomes. *Obstetrics & Gynecology* 2010;115(6):1267-78.
9. McMahon MJ, Luther ER, Bowes Jr WA, et al. Comparison of a trial of labor with an elective second cesarean section. *New England journal of medicine* 1996;335(10):689-95.
10. Suarez-Easton S, Zafran N, Garmi G, et al. Postcesarean wound infection: prevalence, impact, prevention, and management challenges. *International journal of women's health* 2017;9:81.
11. Lehmann S, Baghestan E, Børdahl PE, et al. Low risk pregnancies after a cesarean section: Determinants of trial of labor and its failure. *Plos one* 2020;15(1):e0226894.
12. Wu Y, Kataria Y, Wang Z, et al. Factors associated with successful vaginal birth after a cesarean section: a systematic review and meta-analysis. *BMC pregnancy and childbirth* 2019;19(1):1-12.
13. Manzanares S, Ruiz-Duran S, Pinto A, et al. An integrated model with classification criteria to predict vaginal delivery success after cesarean section. *The Journal of Maternal-Fetal & Neonatal Medicine* 2020;33(2):236-42.
14. Minsart A-F, Liu H, Moffett S, et al. Vaginal birth after caesarean delivery in Chinese women and Western immigrants in Shanghai. *Journal of Obstetrics and Gynaecology* 2017;37(4):446-49.
15. Familiari A, Neri C, Caruso A, et al. Vaginal birth after caesarean section: a multicentre study on prognostic factors and feasibility. *Archives of gynecology and obstetrics* 2020;301(2):509-15. doi: 10.1007/s00404-020-05454-0 [published Online First: 2020/02/13]

16. Smithies M, Woolcott CG, Brock J-AK, et al. Factors associated with trial of labour and mode of delivery in Robson Group 5: A select group of women with previous caesarean section. *Journal of Obstetrics and Gynaecology Canada* 2018;40(6):704-11.
17. Baranov A, Salvesen K, Vikhareva O. Validation of prediction model for successful vaginal birth after Cesarean delivery based on sonographic assessment of hysterotomy scar. *Ultrasound in Obstetrics & Gynecology* 2018;51(2):189-93.
18. Mooney SS, Hiscock R, Clarke IDA, et al. Estimating success of vaginal birth after caesarean section in a regional Australian population: Validation of a prediction model. *Australian and New Zealand Journal of Obstetrics and Gynaecology* 2019;59(1):66-70.
19. Balshem H, Helfand M, Schünemann HJ, et al. GRADE guidelines: 3. Rating the quality of evidence. *Journal of clinical epidemiology* 2011;64(4):401-06.
20. Moher D, Liberati A, Tetzlaff J, et al. Preferred reporting items for systematic reviews and meta-analyses: the PRISMA statement. *PLoS medicine* 2009;6(7):e1000097. doi: 10.1371/journal.pmed.1000097 [published Online First: 2009/07/22]
21. DerSimonian R, Laird N. Meta-analysis in clinical trials. *Controlled clinical trials* 1986;7(3):177-88.
22. Higgins JP, Thompson SG, Deeks JJ, et al. Measuring inconsistency in meta-analyses. *Bmj* 2003;327(7414):557-60.
23. Egger M, Smith GD, Schneider M, et al. Bias in meta-analysis detected by a simple, graphical test. *Bmj* 1997;315(7109):629-34.
24. Mei Z, Wang Q, Zhang Y, et al. Risk factors for recurrence after anal fistula surgery: a meta-analysis. *International Journal of Surgery* 2019;69:153-64.
25. Darzi AJ, Karam SG, Spencer FA, et al. Risk models for VTE and bleeding in medical inpatients: systematic identification and expert assessment. *Blood advances* 2020;4(12):2557-66. doi: 10.1182/bloodadvances.2020001937 [published Online First: 2020/06/17]
26. Xu Q, Huang Y, Chen B. Comprehensive assessment of health education and health promotion in five non-communicable disease demonstration districts in China: a cross-sectional study. *BMJ open* 2017;7(12):e015943. doi: 10.1136/bmjopen-2017-015943 [published Online First: 2017/12/29]
27. Mrowietz U, de Jong EM, Kragballe K, et al. A consensus report on appropriate treatment optimization and transitioning in the management of moderate-to-severe plaque psoriasis. *Journal of the European Academy of Dermatology and Venereology : JEADV* 2014;28(4):438-53. doi: 10.1111/jdv.12118 [published Online First: 2013/02/27]
28. Suzuki Y, Fukasawa M, Nakajima S, et al. Development of disaster mental health guidelines through the Delphi process in Japan. *International journal of mental health systems* 2012;6(1):7. doi: 10.1186/1752-4458-6-7 [published Online First: 2012/07/04]



- 1  
2  
3  
4  
5  
6  
7  
8  
9  
10  
11  
12  
13  
14  
15  
16  
17  
18  
19  
20  
21  
22  
23  
24  
25  
26  
27  
28  
29  
30  
31  
32  
33  
34  
35  
36  
37  
38  
39  
40  
41  
42  
43  
44  
45  
46  
47  
48  
49  
50  
51  
52  
53  
54  
55  
56  
57  
58  
59  
60
29. Konstantinou K, Hider SL, Vogel S, et al. Development of an assessment schedule for patients with low back-associated leg pain in primary care: a Delphi consensus study. *European spine journal : official publication of the European Spine Society, the European Spinal Deformity Society, and the European Section of the Cervical Spine Research Society* 2012;21(7):1241-9. doi: 10.1007/s00586-011-2057-2 [published Online First: 2011/11/05]
30. Williamson PR, Altman DG, Blazeby JM, et al. Developing core outcome sets for clinical trials: issues to consider. *Trials* 2012;13:132. doi: 10.1186/1745-6215-13-132 [published Online First: 2012/08/08]
31. Teoh JY, MacLennan S, Chan VW, et al. An International Collaborative Consensus Statement on En Bloc Resection of Bladder Tumour Incorporating Two Systematic Reviews, a Two-round Delphi Survey, and a Consensus Meeting. *European urology* 2020;78(4):546-69. doi: 10.1016/j.eururo.2020.04.059 [published Online First: 2020/05/12]
32. Bilbro NA, Hirst A, Paez A, et al. The IDEAL Reporting Guidelines: A Delphi Consensus Statement Stage specific recommendations for reporting the evaluation of surgical innovation. *Annals of surgery* 2020 doi: 10.1053/j.ajkd.2020.03.014  
10.1097/sla.0000000000004180 [published Online First: 2020/07/14  
2020/07/11]
33. Danese S, Bonovas S, Lopez A, et al. Identification of Endpoints for Development of Antifibrosis Drugs for Treatment of Crohn's Disease. *Gastroenterology* 2018;155(1):76-87. doi: 10.1053/j.gastro.2018.03.032 [published Online First: 2018/03/31]
34. Wingert A, Hartling L, Sebastianski M, et al. Clinical interventions that influence vaginal birth after cesarean delivery rates: Systematic Review & Meta-Analysis. *BMC Pregnancy Childbirth* 2019;19(1):529. doi: 10.1186/s12884-019-2689-5 [published Online First: 2020/01/01]

**Table 1.** Search strategy for Pubmed.

|                                                                                                                                                                                                  |
|--------------------------------------------------------------------------------------------------------------------------------------------------------------------------------------------------|
| 1. "Vaginal Birth after Cesarean"[Mesh]                                                                                                                                                          |
| 2. "Trial of Labor"[Mesh]                                                                                                                                                                        |
| 3. "Cesarean Section, Repeat"[Mesh]                                                                                                                                                              |
| 4. "Cesarean Section"[Mesh]                                                                                                                                                                      |
| 5. 1-4/OR                                                                                                                                                                                        |
| 6. 'Vaginal Birth after Cesarean' OR VBAC OR 'trial of labor' OR 'cesarean section' OR TOLAC OR 'vaginal birth*' OR 'vaginal deliver*' OR 'trial of labour' OR 'active labor' OR 'active labour' |
| 7. 5 OR 6                                                                                                                                                                                        |

**Figure legend****Figure 1.** Flowchart of the study design.



Figure 1. Flowchart of the study design.
